# Supplementary material
Source: HighWire-hosted journal article supplement (https://gh.bmj.com/content/8/12/e012581)
Supplement: inline-supplementary-material-1 [file inline-supplementary-material-1.pdf]

## Supplementary Materials

### Abbreviations used in the supplementary materials:

AFR = African Region  
AMR = American Region  
C-C = case-control  
COSMOS-E = Conducting Systematic Reviews and Meta-Analyses of Observational Studies of Etiology  
C-S = cross-sectional  
DM = diabetes mellitus  
EHR = electronic health (medical) record  
EMR = East Mediterranean Region  
ES = effect size  
EUR = European Region  
GHSI = Global Health Security Index  
HI = high income  
HR = hazard ratio  
HTN = hypertension  
LMI = lower middle income  
MOOSE = meta-analyses Of Observational Studies in Epidemiology  
NOS = Newcastle-Ottawa Scale  
Ob = obesity  
OR = odds ratio  
PRR = pooled risk ratio  
PRISMA = Preferred Reporting Items for Systematic Reviews and Meta-Analyses  
RR = relative risk or risk ratio  
ARS = administrative/registry/surveillance or (case) reporting system  
SEAR = Southeast Asian Region  
UK = United Kingdom  
UMI = upper middle income  
USA = United States of America  
WB = World Bank  
WHO = World Health Organization  
WPR = West Pacific Region

**Supplementary Text 1****Search Strategy**

**Time period:** December 1<sup>st</sup>, 2019, through December 31<sup>st</sup>, 2020.

**Key words or terms:**

1. (COVID-19 and all possible variations) AND
2. (Diabetes, obesity, hypertension, and all relevant terms) OR
3. (Comorbidity, comorbid disease or illness or condition, underlying disease or illness or condition, chronic disease or illness or condition, noncommunicable disease or NCD, predictor, risk or risk factor, determinant, cardiovascular, and metabolic).

**No restrictions in language, gender, age, publication types.**

**Databases:** all 16 databases.

| Database                            | Strategy                                                                                                                                                                                                                                                                                                                                                                                                                                                                                                                                                                                                                                                                                                                                                                                                                                                                                                                                                                                                     | Records<br>08/17/2020                                        | Update<br>09/16/2020                                         | Update<br>01/15/2021                                          |
|-------------------------------------|--------------------------------------------------------------------------------------------------------------------------------------------------------------------------------------------------------------------------------------------------------------------------------------------------------------------------------------------------------------------------------------------------------------------------------------------------------------------------------------------------------------------------------------------------------------------------------------------------------------------------------------------------------------------------------------------------------------------------------------------------------------------------------------------------------------------------------------------------------------------------------------------------------------------------------------------------------------------------------------------------------------|--------------------------------------------------------------|--------------------------------------------------------------|---------------------------------------------------------------|
| <b>Medline<br/>(OVID)<br/>1946-</b> | novel coronavirus* OR novel corona virus* OR 2019 coronavirus OR coronavirus disease OR coronavirus 2019 OR betacoronavirus* OR covid19 OR covid 19 OR nCoV OR novel CoV OR CoV 2 OR CoV2 OR sarscov2 OR sars-cov OR sarscov OR 2019nCoV OR 2019-nCoV OR wuhan virus* OR ((wuhan OR hubei OR huanan) AND (severe acute respiratory OR pneumonia*)) AND outbreak* AND (201912*.dt OR 2020*.dt) OR ((coronavirus OR pandemic).mp AND (201912*.dt OR 2020*.dt))<br><br>AND<br><br>Diabetes OR diabetic OR blood glucose OR glyc?emic control OR glucose control OR hyperglyc?emia OR hypoglyc?emia OR obesity OR obese OR overweight OR adipos* OR waist circumference OR BMI OR body mass index OR hypertension OR hypertensive OR high blood pressure OR comorbid* OR co-morbid* OR pre-existing OR preexisting OR underlying OR chronic disease* OR chronic illness* OR chronic condition* OR noncommunicable disease* OR cardiovascular disease* OR predictor* OR determinant* OR risk factor* OR metabolic | 5856                                                         | 1586                                                         | 7932                                                          |
| <b>Embase<br/>(OVID)<br/>1988-</b>  | (novel coronavirus* OR novel corona virus* OR 2019 coronavirus OR coronavirus disease OR coronavirus 2019 OR betacoronavirus* OR covid19 OR covid 19 OR nCoV OR novel CoV OR CoV 2 OR CoV2 OR sarscov2 OR sars-cov OR sarscov OR 2019nCoV OR 2019-nCoV OR wuhan virus*) OR ((wuhan OR hubei OR huanan) AND (severe acute respiratory OR pneumonia*)) AND outbreak*) OR ((coronavirus OR pandemic).mp AND 2020*.dc)<br><br>AND<br><br>Diabetes OR diabetic OR blood glucose OR glyc?emic control OR glucose control OR hyperglyc?emia OR hypoglyc?emia OR obesity OR obese OR overweight OR adipos* OR waist circumference OR BMI OR body mass index OR hypertension OR hypertensive OR high blood pressure OR comorbid* OR co-morbid* OR pre-existing OR preexisting OR underlying OR chronic disease* OR chronic illness* OR chronic condition* OR noncommunicable disease* OR cardiovascular disease* OR predictor* OR determinant* OR risk factor* OR metabolic<br><br>Not pubmed/medline                 | 6461<br><br>-4050<br>duplicates<br><br>=2411<br>unique items | 2816<br><br>-1677<br>duplicates<br><br>=1139<br>unique items | 11477<br><br>-5134<br>duplicates<br><br>=6343<br>unique items |
| <b>Global Health<br/>(OVID)</b>     | (novel coronavirus* OR novel corona virus* OR 2019 coronavirus OR coronavirus disease OR coronavirus 2019 OR betacoronavirus* OR covid19 OR covid 19 OR nCoV OR novel CoV OR CoV 2 OR CoV2 OR sarscov2 OR sars-cov OR sarscov OR 2019nCoV OR 2019-nCoV OR wuhan virus*) OR (((wuhan OR hubei OR huanan) AND (severe acute respiratory OR pneumonia*)) AND outbreak*) AND 2020*.up) OR ((coronavirus OR pandemic).mp AND 2020*.up)<br><br>AND<br><br>Diabetes OR diabetic OR blood glucose OR glyc?emic control OR glucose control OR hyperglyc?emia OR hypoglyc?emia OR obesity OR obese OR overweight OR adipos* OR waist circumference OR BMI OR body mass index OR hypertension OR hypertensive OR high blood pressure OR comorbid* OR co-morbid* OR pre-existing OR preexisting OR underlying OR chronic disease* OR chronic illness*                                                                                                                                                                    | 1102<br><br>-744<br>duplicates<br><br>=358<br>unique items   | 273<br><br>-107<br>duplicates<br><br>=166<br>unique items    | 3225<br><br>-1597<br>duplicates<br><br>=1628<br>unique items  |

|                                   |                                                                                                                                                                                                                                                                                                                                                                                                                                                                                                                                                                                                                                                                                                                                                                                                                                                                                                                                                                                             |                                                             |                                                           |                                                             |
|-----------------------------------|---------------------------------------------------------------------------------------------------------------------------------------------------------------------------------------------------------------------------------------------------------------------------------------------------------------------------------------------------------------------------------------------------------------------------------------------------------------------------------------------------------------------------------------------------------------------------------------------------------------------------------------------------------------------------------------------------------------------------------------------------------------------------------------------------------------------------------------------------------------------------------------------------------------------------------------------------------------------------------------------|-------------------------------------------------------------|-----------------------------------------------------------|-------------------------------------------------------------|
|                                   | OR chronic condition* OR noncommunicable disease* OR cardiovascular disease* OR predictor* OR determinant* OR risk factor* OR metabolic                                                                                                                                                                                                                                                                                                                                                                                                                                                                                                                                                                                                                                                                                                                                                                                                                                                     |                                                             |                                                           |                                                             |
| <b>CAB Abstracts (OVID)</b>       | (novel coronavirus* OR novel corona virus* OR 2019 coronavirus OR coronavirus disease OR coronavirus 2019 OR betacoronavirus* OR covid19 OR covid 19 OR nCoV OR novel CoV OR CoV 2 OR CoV2 OR sarscov2 OR sars-cov OR sarscov OR 2019nCoV OR 2019-nCoV OR wuhan virus*) OR ((wuhan OR hubei OR huanan) AND (severe acute respiratory OR pneumonia*) AND outbreak*) OR ((coronavirus OR pandemic).mp AND 2020*.up)<br>AND<br>Diabetes OR diabetic OR blood glucose OR glyc?emic control OR glucose control OR hyperglyc?emia OR hypoglyc?emia OR obesity OR obese OR overweight OR adipos* OR waist circumference OR BMI OR body mass index OR hypertension OR hypertensive OR high blood pressure OR comorbid* OR co-morbid* OR pre-existing OR preexisting OR underlying OR chronic disease* OR chronic illness* OR chronic condition* OR noncommunicable disease* OR cardiovascular disease* OR predictor* OR determinant* OR risk factor* OR metabolic                                   | 501<br><br>-463<br>duplicates<br><br>=38<br>unique items    | 125<br><br>-121<br>duplicates<br><br>=4<br>unique items   | 685<br><br>-669<br>duplicates<br><br>=16<br>unique items    |
| <b>PsycInfo (OVID) 1987-</b>      | (novel coronavirus* OR novel corona virus* OR 2019 coronavirus OR coronavirus disease OR coronavirus 2019 OR betacoronavirus* OR covid19 OR covid 19 OR nCoV OR novel CoV OR CoV 2 OR CoV2 OR sarscov2 OR sars-cov OR sarscov OR 2019nCoV OR 2019-nCoV OR wuhan virus*) OR (((wuhan OR hubei OR huanan) AND (severe acute respiratory OR pneumonia*) AND outbreak*) AND 2020*.up) OR ((coronavirus OR pandemic).mp AND 2020*.up)<br>AND<br>Diabetes OR diabetic OR blood glucose OR glyc?emic control OR glucose control OR hyperglyc?emia OR hypoglyc?emia OR obesity OR obese OR overweight OR adipos* OR waist circumference OR BMI OR body mass index OR hypertension OR hypertensive OR high blood pressure OR comorbid* OR co-morbid* OR pre-existing OR preexisting OR underlying OR chronic disease* OR chronic illness* OR chronic condition* OR noncommunicable disease* OR cardiovascular disease* OR predictor* OR determinant* OR risk factor* OR metabolic                    | 159<br><br>-106<br>duplicates<br><br>=53<br>unique items    | 74<br><br>-47<br>duplicates<br><br>=27<br>unique items    | 609<br><br>-254<br>duplicates<br><br>=355<br>unique items   |
| <b>CINAHL (EbscoHost)</b>         | ("novel coronavirus*" OR "novel corona virus*" OR "2019 coronavirus" OR betacoronavirus* OR covid19 OR "covid 19" OR nCoV OR "novel CoV" OR "CoV 2" OR CoV2 OR sarscov2 OR sars-cov OR sarscov OR 2019nCoV OR 2019-nCoV OR "wuhan virus*") OR (((wuhan OR hubei OR huanan) AND ("severe acute respiratory" OR pneumonia*) AND outbreak*) AND PY 2020) OR ((coronavirus OR pandemic) AND PY 2020)<br>AND<br>Diabetes OR diabetic OR "blood glucose" OR "glyc?emic control" OR "glucose control" OR hyperglyc?emia OR hypoglyc?emia OR obesity OR obese OR overweight OR adipos* OR "waist circumference" OR BMI OR "body mass index" OR hypertension OR hypertensive OR "high blood pressure" OR comorbid* OR co-morbid* OR pre-existing OR preexisting OR underlying OR "chronic disease*" OR "chronic illness*" OR "chronic condition*" OR "noncommunicable disease*" OR "cardiovascular disease*" OR predictor* OR determinant* OR "risk factor*" OR metabolic<br>Exclude Medline records | 1668<br><br>-602<br>duplicates<br><br>=766<br>unique items  | 264<br><br>-105<br>duplicates<br><br>=259<br>unique items | 1225<br><br>-569<br>duplicates<br><br>=656<br>unique items  |
| <b>Academic Research Complete</b> | ("novel coronavirus*" OR "novel corona virus*" OR "2019 coronavirus" OR betacoronavirus* OR covid19 OR "covid 19" OR nCoV OR "novel CoV" OR "CoV 2" OR CoV2 OR sarscov2 OR sars-cov OR sarscov OR 2019nCoV OR 2019-nCoV OR "wuhan virus*") OR (((wuhan OR hubei OR huanan) AND ("severe acute respiratory" OR pneumonia*) AND outbreak*) AND PY 2020) OR ((coronavirus OR pandemic) AND PY 2020)<br>AND<br>Diabetes OR diabetic OR "blood glucose" OR "glyc?emic control" OR "glucose control" OR hyperglyc?emia OR hypoglyc?emia OR obesity OR obese OR overweight OR adipos* OR "waist circumference" OR BMI OR "body mass index" OR hypertension OR hypertensive OR "high blood pressure" OR comorbid* OR co-morbid* OR pre-existing OR preexisting OR underlying OR "chronic disease*" OR "chronic illness*" OR "chronic condition*" OR "noncommunicable disease*" OR "cardiovascular disease*" OR predictor* OR determinant* OR "risk factor*" OR metabolic                            | 1644<br><br>-1096<br>duplicates<br><br>=548<br>unique items | 647<br><br>-448<br>duplicates<br><br>=199<br>unique items | 2585<br><br>-1979<br>duplicates<br><br>=606<br>unique items |
| <b>Africa Wide Information</b>    | ("novel coronavirus*" OR "novel corona virus*" OR "2019 coronavirus" OR betacoronavirus* OR covid19 OR "covid 19" OR nCoV OR "novel CoV" OR "CoV 2" OR CoV2 OR sarscov2 OR sars-cov OR sarscov OR 2019nCoV OR 2019-nCoV OR "wuhan virus*") OR (((wuhan OR hubei OR huanan) AND ("severe acute respiratory" OR pneumonia*) AND outbreak*) AND PY 2020) OR ((coronavirus OR pandemic) AND PY 2020)<br>AND                                                                                                                                                                                                                                                                                                                                                                                                                                                                                                                                                                                     | 6<br><br>-1<br>duplicates<br><br>=5<br>unique items         | 0                                                         | 15<br><br>-3<br>duplicates<br><br>=11<br>unique items       |

|                                                                                                                                                        |                                                                                                                                                                                                                                                                                                                                                                                                                                                                                                                                                                                                                                                                                                                                                                                                                                                                                                                                                                                                                                                                                                                                                                                                                                                                                                                                                                                                                                                                                                                                                                                                                                                        |                                                                          |                                                                                                |                                                            |
|--------------------------------------------------------------------------------------------------------------------------------------------------------|--------------------------------------------------------------------------------------------------------------------------------------------------------------------------------------------------------------------------------------------------------------------------------------------------------------------------------------------------------------------------------------------------------------------------------------------------------------------------------------------------------------------------------------------------------------------------------------------------------------------------------------------------------------------------------------------------------------------------------------------------------------------------------------------------------------------------------------------------------------------------------------------------------------------------------------------------------------------------------------------------------------------------------------------------------------------------------------------------------------------------------------------------------------------------------------------------------------------------------------------------------------------------------------------------------------------------------------------------------------------------------------------------------------------------------------------------------------------------------------------------------------------------------------------------------------------------------------------------------------------------------------------------------|--------------------------------------------------------------------------|------------------------------------------------------------------------------------------------|------------------------------------------------------------|
|                                                                                                                                                        | Diabetes OR diabetic OR "blood glucose" OR "glyc?emic control" OR "glucose control" OR hyperglyc?emia OR hypoglyc?emia OR obesity OR obese OR overweight OR adipos* OR "waist circumference" OR BMI OR "body mass index" OR hypertension OR hypertensive OR "high blood pressure" OR comorbid* OR co-morbid* OR pre-existing OR preexisting OR underlying OR "chronic disease*" OR "chronic illness*" OR "chronic condition*" OR "noncommunicable disease*" OR "cardiovascular disease*" OR predictor* OR determinant* OR "risk factor*" OR metabolic                                                                                                                                                                                                                                                                                                                                                                                                                                                                                                                                                                                                                                                                                                                                                                                                                                                                                                                                                                                                                                                                                                  |                                                                          |                                                                                                |                                                            |
| <b>Scopus</b>                                                                                                                                          | TITLE-ABS("novel coronavir*" OR "novel corona virus*" OR "2019 coronavirus" OR betacoronavir* OR covid19 OR "covid 19" OR nCoV OR "CoV 2" OR cov2 OR sarscov2 OR sars-cov OR sarscov OR 2019ncov OR 2019-nCoV OR "novel CoV" OR "wuhan virus" ) AND TITLE-ABS(Diabetes OR diabetic OR "blood glucose" OR "glyc?emic control" OR "glucose control" OR hyperglyc?emia OR hypoglyc?emia OR obesity OR obese OR overweight OR adipos* OR "waist circumference" OR BMI OR "body mass index" OR hypertension OR hypertensive OR "high blood pressure" OR comorbid* OR co-morbid* OR pre-existing OR preexisting OR underlying OR "chronic disease*" OR "chronic illness*" OR "chronic condition*" OR "noncommunicable disease*" OR "cardiovascular disease*" OR predictor* OR determinant* OR "risk factor*" OR metabolic)                                                                                                                                                                                                                                                                                                                                                                                                                                                                                                                                                                                                                                                                                                                                                                                                                                   | 4021<br><br>-3551<br>duplicates<br><br>=470<br>unique items              | 94<br><br>-73<br>duplicates<br><br>=21<br>unique items                                         | 1038<br><br>-702<br>duplicates<br><br>=336<br>unique items |
| <b>PMC</b>                                                                                                                                             | ("novel coronavir*" [Title/Abstract] OR "novel corona virus*" [Title/Abstract] OR "2019 coronavirus" [Title/Abstract] OR "betacoronavir*" [Title/Abstract] OR "covid19" [Title/Abstract] OR "covid 19" [Title/Abstract] OR "nCoV" [Title/Abstract] OR "CoV 2" [Title/Abstract] OR "cov2" [Title/Abstract] OR "sarscov2" [Title/Abstract] OR "sars-cov" [Title/Abstract] OR "sarscov" [Title/Abstract] OR "2019ncov" [Title/Abstract] OR "2019-nCoV" [Title/Abstract] OR "novel CoV" [Title/Abstract] OR "wuhan virus" [All Fields])<br><br>AND<br>Diabetes [Title/Abstract] OR diabetic [Title/Abstract] OR "blood glucose" [Title/Abstract] OR "glyc?emic control" [Title/Abstract] OR "glucose control" [Title/Abstract] OR hyperglyc?emia [Title/Abstract] OR hypoglyc?emia [Title/Abstract] OR obesity [Title/Abstract] OR obese [Title/Abstract] OR overweight [Title/Abstract] OR adipos* [Title/Abstract] OR "waist circumference" [Title/Abstract] OR BMI [Title/Abstract] OR "body mass index" [Title/Abstract] OR hypertension [Title/Abstract] OR hypertensive [Title/Abstract] OR "high blood pressure" [Title/Abstract] OR comorbid* [Title/Abstract] OR co-morbid* [Title/Abstract] OR pre-existing [Title/Abstract] OR preexisting [Title/Abstract] OR underlying [Title/Abstract] OR "chronic disease*" [Title/Abstract] OR "chronic illness*" [Title/Abstract] OR "chronic condition*" [Title/Abstract] OR "noncommunicable disease*" [Title/Abstract] OR "cardiovascular disease*" [Title/Abstract] OR predictor* [Title/Abstract] OR determinant* [Title/Abstract] OR "risk factor*" [Title/Abstract] OR metabolic [Title/Abstract] | 918<br><br>-676<br>duplicates<br><br>=242<br>unique items                | 243<br><br>-172<br>duplicates<br><br>=71<br>unique items                                       | 791<br><br>-727<br>duplicates<br><br>=64<br>unique items   |
| <b>ProQuest Central</b>                                                                                                                                | TI,AB("novel coronavir*" OR "novel corona virus*" OR "2019 coronavirus" OR betacoronavir* OR covid19 OR "covid 19" OR nCoV OR "novel CoV" OR "CoV 2" OR CoV2 OR sarscov2 OR sars-cov OR sarscov OR 2019nCoV OR 2019-nCoV)<br><br>AND<br>TI,AB(Diabetes OR diabetic OR "blood glucose" OR "glyc?emic control" OR "glucose control" OR hyperglyc?emia OR hypoglyc?emia OR obesity OR obese OR overweight OR adipos* OR "waist circumference" OR BMI OR "body mass index" OR hypertension OR hypertensive OR "high blood pressure" OR comorbid* OR co-morbid* OR pre-existing OR preexisting OR underlying OR "chronic disease*" OR "chronic illness*" OR "chronic condition*" OR "noncommunicable disease*" OR "cardiovascular disease*" OR predictor* OR determinant* OR "risk factor*" OR metabolic)                                                                                                                                                                                                                                                                                                                                                                                                                                                                                                                                                                                                                                                                                                                                                                                                                                                   | 1238<br><br>-844<br>duplicates<br><br>=394<br>unique items               | 483<br><br>-339<br>duplicates<br><br>=144<br>unique items                                      | 1256<br><br>-760<br>duplicates<br><br>=496<br>unique items |
| <b>SBT COVID-19 Library</b><br><br><b>This library covers (PrePrints - Medrxiv, BIORxiv, Chemrxiv, SSRN, Scielo -, WHO COVID-19 database, Homeland</b> | Diabetes OR diabetic OR "blood glucose" OR "glyc?emic control" OR "glucose control" OR hyperglyc?emia OR hypoglyc?emia OR obesity OR obese OR overweight OR adipos* OR "waist circumference" OR BMI OR "body mass index" OR hypertension OR hypertensive OR "high blood pressure" OR comorbid* OR co-morbid* OR pre-existing OR preexisting OR underlying OR "chronic disease*" OR "chronic illness*" OR "chronic condition*" OR "noncommunicable disease*" OR "cardiovascular disease*" OR predictor* OR determinant* OR "risk factor*" OR metabolic                                                                                                                                                                                                                                                                                                                                                                                                                                                                                                                                                                                                                                                                                                                                                                                                                                                                                                                                                                                                                                                                                                  | Preprints = 1602<br><br>WHO = 913<br><br>HLSC = 25<br><br>SciFinder = 82 | Preprints = 26<br><br>WHO = 0<br><br>HLSC = 0<br><br>SciFinder = 0<br><br>Clinicaltrials = 384 | No longer being updated                                    |

|                                                                  |  |                      |             |              |
|------------------------------------------------------------------|--|----------------------|-------------|--------------|
| <b>Security COVID-19 collection, SciFinder, Clinicaltrials )</b> |  | Clinicaltrials = 326 |             |              |
| <b>Total</b>                                                     |  | <b>13646</b>         | <b>3467</b> | <b>18443</b> |

Notes: Duplicates were identified using the Endnote automated "find duplicates" function with preference set to match on title, author, and year, and removed from your Endnote library. There will likely be additional duplicates found that Endnote was unable to detect.

Total records before removing duplicates = 35,556; total records after removing duplicates via Endnote 20 = 34,830; total records after further removing duplicates via Covidence = 30,586.

## Supplementary Text 2

### Adapted Newcastle-Ottawa Scale (NOS) for assessing the quality of nonrandomised studies in meta-analyses

#### A. CASE-CONTROL STUDIES

Note: A study can be awarded a maximum of one star for each numbered item within the Selection and Exposure components. A maximum of two stars can be given for the Comparability component.

##### Selection (Maximum 4 stars)

- 1) Is the case definition adequate?
  - a) yes, with independent validation\*
  - b) yes, e.g., record linkage or based on self-reports
  - c) no description
- 2) Representativeness of the cases
  - a) consecutive or obviously representative series of cases\*
  - b) potential for selection biases or not stated
- 3) Selection of Controls
  - a) community controls\*
  - b) hospital controls
  - c) no description
- 4) Definition of Controls
  - a) no history of disease (endpoint)\*
  - b) no description of source

##### Comparability (Maximum 2 stars)

- 1) Comparability of cases and controls on the basis of the design or analysis
  - a) study controls for age (the most important factor)\*
  - b) study controls for age plus any additional factor\*\* (This criterion could be modified to indicate specific control for a second important factor)
  - c) study does not control for any confounders or no information provided

##### Exposure (Maximum 3 stars)

- 1) Ascertainment of exposure
  - a) secure record (e.g., surgical records)\*
  - b) structured interview where blind to case/control status\*
  - c) interview not blinded to case/control status
  - d) written self-report or medical record only
  - e) no description
- 2) Same method of ascertainment for cases and controls
  - a) Yes\*
  - b) no
- 3) Non-Response rate
  - a) same rate for both groups\*

- b) non respondents described
- c) rate different and no designation

## B. COHORT STUDIES

Note: A study can be awarded a maximum of one star for each numbered item within the Selection and Outcome components. A maximum of two stars can be given for the Comparability component.

### Selection (Maximum 4 stars)

- 1) Representativeness of the exposed cohort
  - a) truly representative of the average (describe) in the community\*
  - b) somewhat representative of the average \_\_\_\_\_ in the community\*
  - c) selected group of users (e.g., nurses, volunteers)
  - d) no description of the derivation of the cohort
- 2) Selection of the non-exposed cohort
  - a) drawn from the same community as the exposed cohort\*
  - b) drawn from a different source
  - c) no description of the derivation of the non-exposed cohort
- 3) Ascertainment of exposure
  - a) secure record (e.g., surgical records)\*
  - b) structured interview\*
  - c) written self-report
  - d) no description
- 4) Demonstration that outcome of interest was not present at start of study
  - a) Yes\*
  - b) no

### Comparability (Maximum 2 stars)

- 1) Comparability of cohorts on the basis of the design or analysis
  - a) study controls for \_\_\_\_\_ (select the most important factor)\*
  - b) study controls for the most important factor plus any additional factor\*\* (This criterion could be modified to indicate specific control for a second important factor)
  - c) study does not adjust for any relevant confounders/risk factors or no information provided

### Outcome (Maximum 3 stars)

- 1) Assessment of outcome
  - a) independent blind assessment\*
  - b) record linkage\*
  - c) self-report
  - d) no description
- 2) Was follow-up long enough for outcomes to occur
  - a) yes (select an adequate follow up period for outcome of interest)\*
  - b) no
- 3) Adequacy of follow up of cohorts
  - a) complete follow up - all subjects accounted for\*

- b) subjects lost to follow up unlikely to introduce bias - small number lost - > \_\_\_\_ % (select an adequate %) follow up, or description provided of those lost)\*
- c) follow up rate < \_\_\_\_% (select an adequate %) and no description of those lost
- d) no statement

### C. CROSS-SECTIONAL STUDIES

Note: This scale has been adapted from the Newcastle-Ottawa Quality Assessment Scale for case-control studies and cohort studies to provide quality assessment of cross-sectional studies. A study can be awarded a maximum of one star for each numbered item within the Selection component. A maximum of two stars can be given for the Comparability and Outcome components.

#### **Selection** (Maximum 4 stars)

- 1) Representativeness of the sample
  - a) truly representative of the average in the target population\* (all subjects or random sampling)
  - b) somewhat representative of the average in the target group\* (non-random sampling)
  - c) selected group of users/convenience sample.
  - d) no description of the derivation of the included subjects
- 2) Sample size
  - a) justified and satisfactory (including sample size calculation)\*
  - b) not justified
  - c) no information provided
- 3) Ascertainment of the exposure (risk factor)
  - a) Secure record (e.g., surgical record)\*
  - b) structured interview\*
  - c) written self-report
  - d) no description
- 4) Non-respondents
  - a) proportion of target sample recruited attains pre-specified target or basic summary of non-respondent characteristics in sampling frame recorded\*
  - b) unsatisfactory recruitment rate, no summary data on non-respondents
  - c) no description of the response rate or the characteristics of the responders and the non-responders

#### **Comparability** (Maximum 2 stars)

- 1) Comparability of cohorts on the basis of the design or analysis
  - a) study controls for \_\_\_\_\_ (select the most important factor)\*
  - b) study controls for the most important factor plus any additional factor\*\* (This criterion could be modified to indicate specific control for a second important factor)
  - c) study does not adjust for any relevant confounders/risk factors or no information provided

#### **Outcome** (Maximum 3 stars)

- 1) Assessment of outcome



- a) independent blind assessment\*\*
  - b) record linkage\*
  - c) self-report
  - d) no description
- 2) Statistical test
- a) statistical test used to analyse the data clearly described, appropriate and measures of association presented including confidence intervals and probability level (p-value)\*
  - b) statistical test is not appropriate, not described, or incomplete

**Total NOS scores:** 8-9 stars: high quality or low risk of bias  
5-7 stars: moderate quality or moderate risk of bias  
<5 stars: low quality or high risk of bias.

Supplementary Figures

Fig. S1.1 – Forest Plots for the Association of Diabetes with COVID-19 Mortality

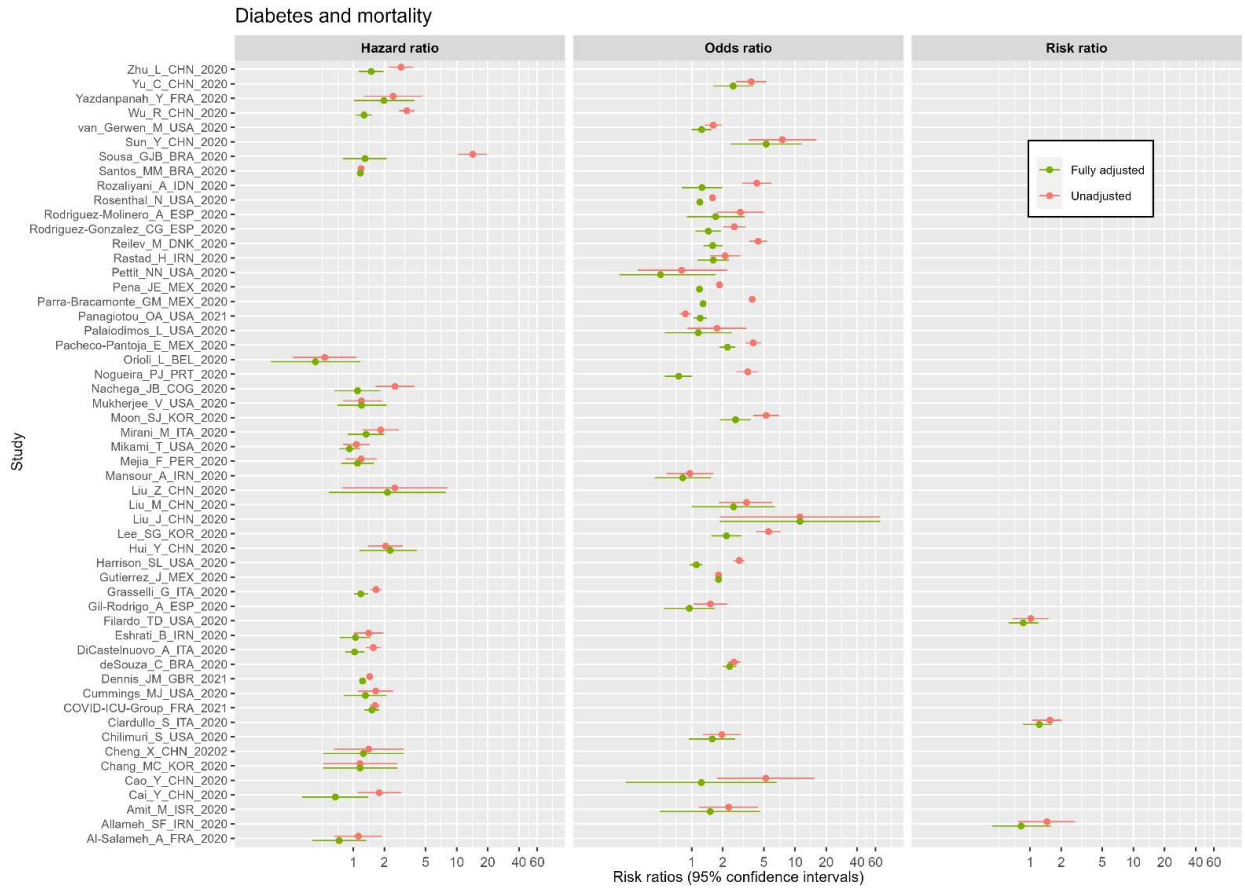

**Fig. S1.2 – Forest Plots for the Association of Hypertension with COVID-19 Mortality**

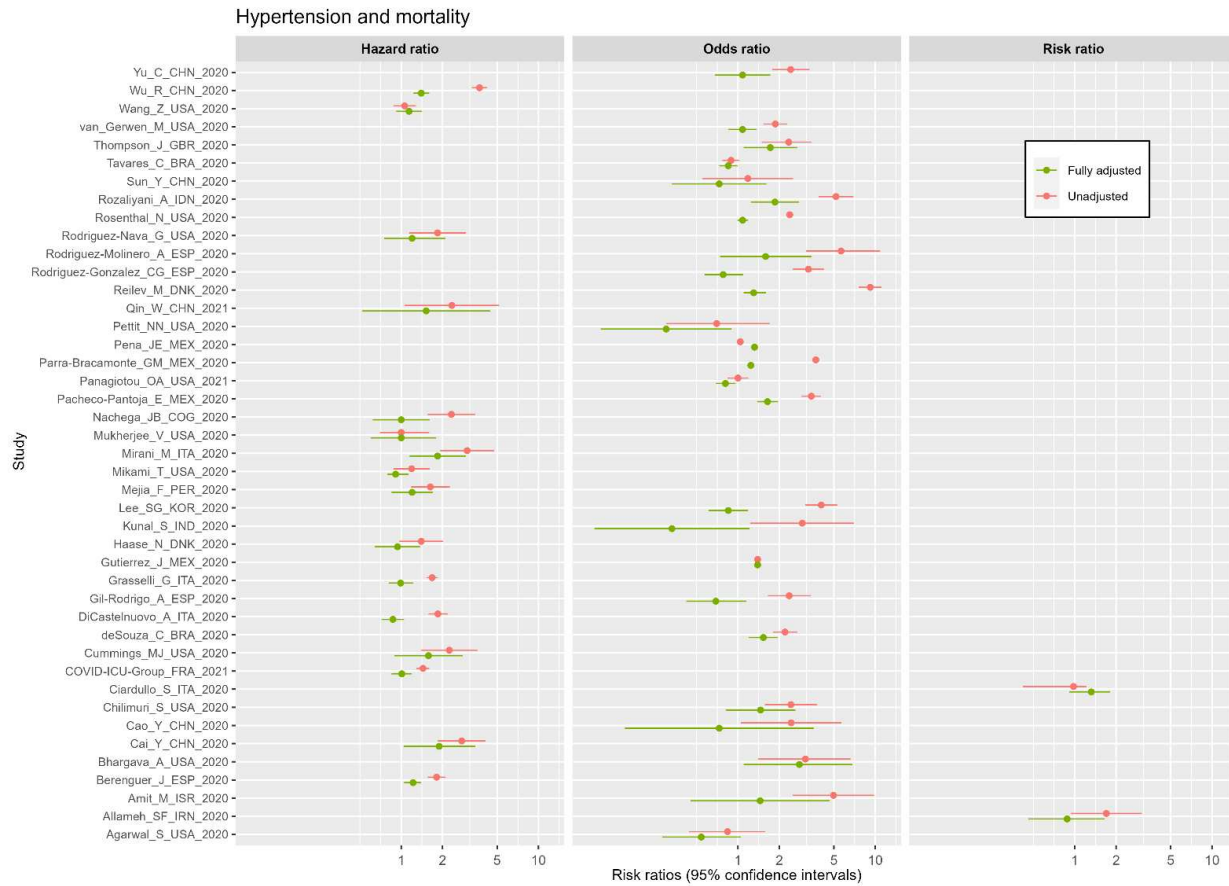

**Fig. S1.3 – Forest Plots for the Association of Obesity with COVID-19 Mortality**

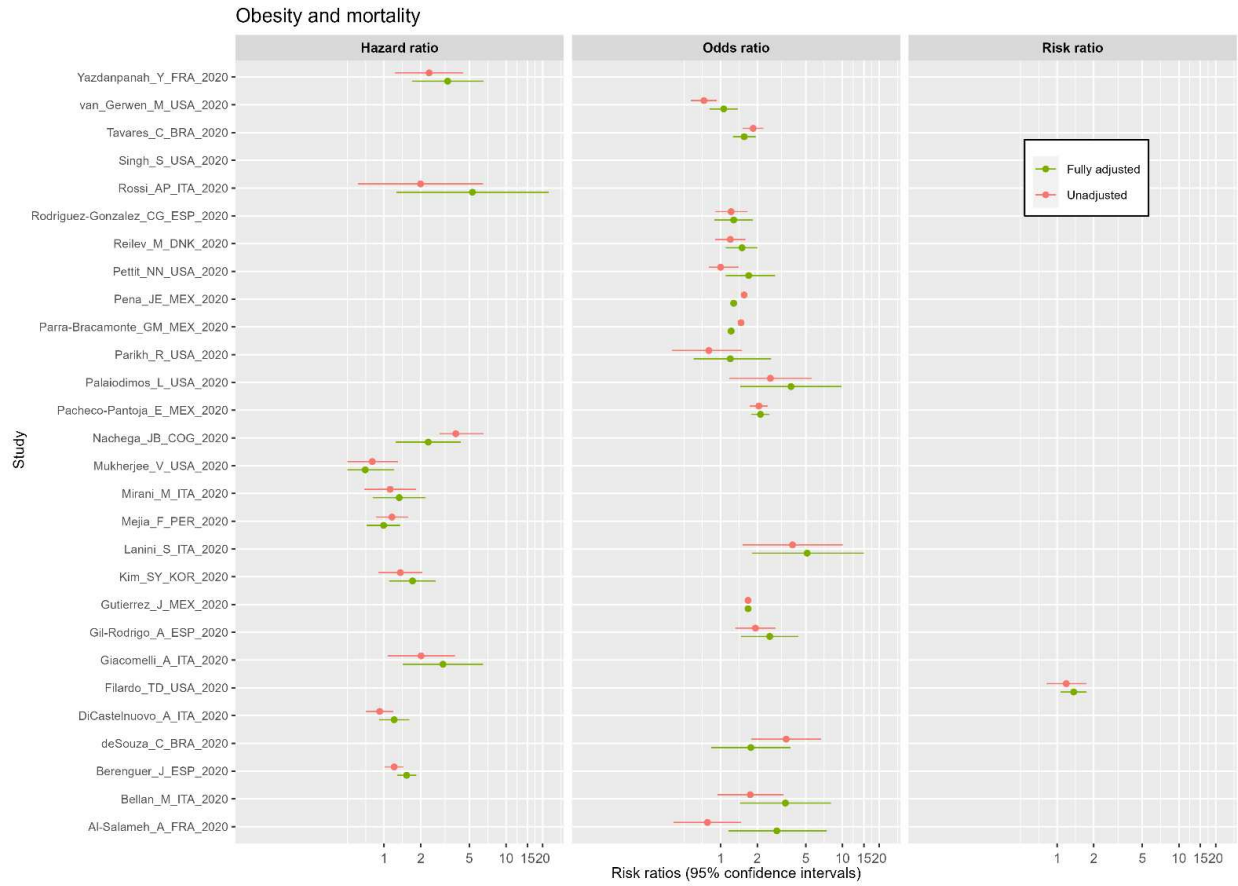

**Fig. S2.1 – Influence Plot for the Association of Diabetes with COVID-19 Mortality**

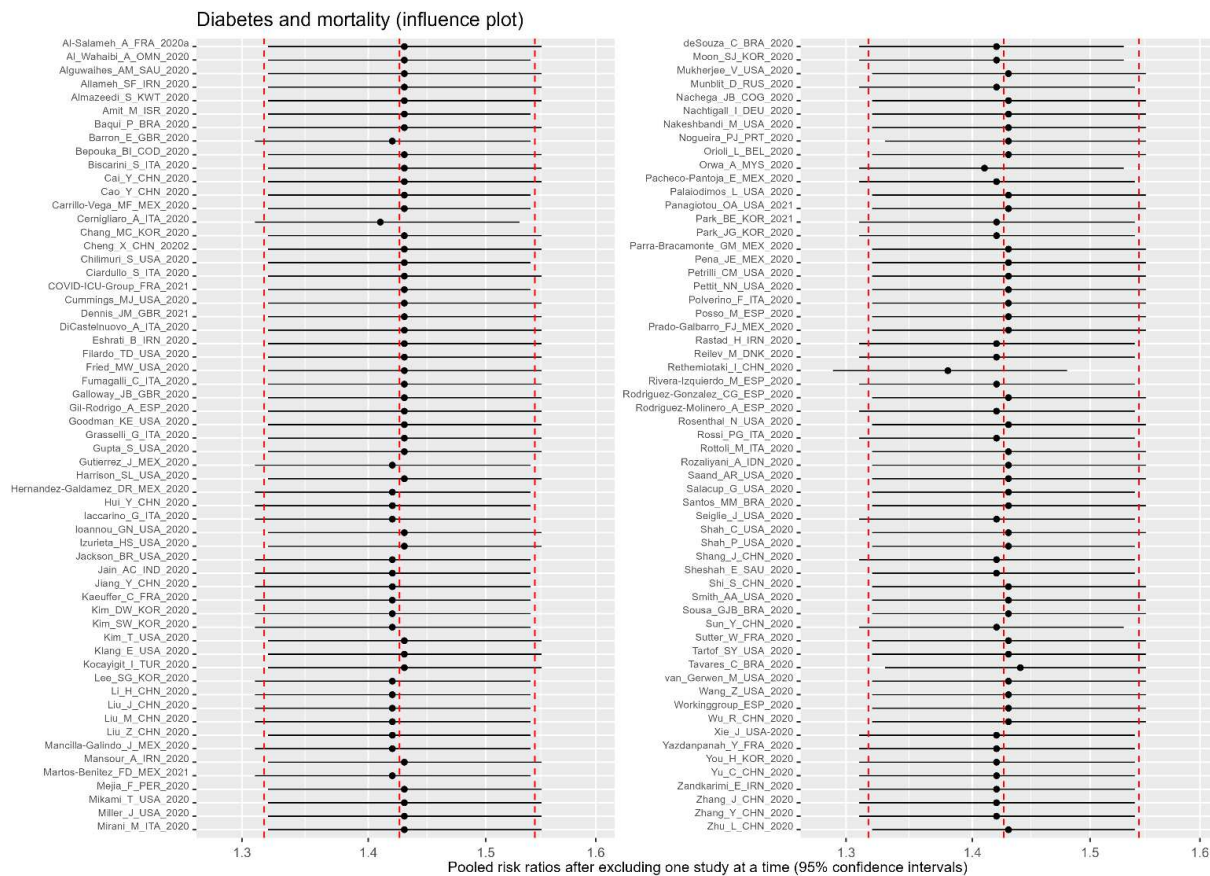

**Fig. S2.2 – Influence Plot for the Association of Hypertension with COVID-19 Mortality**

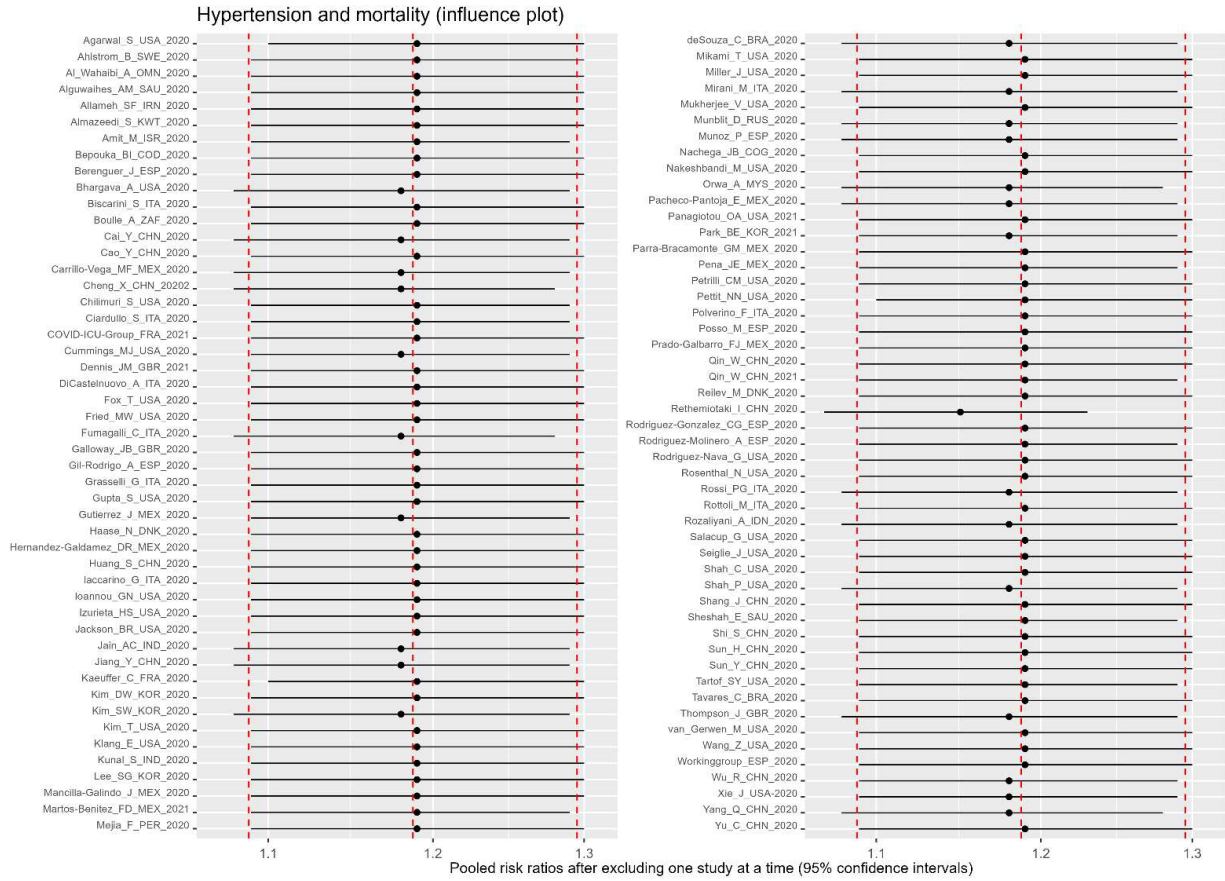

**Fig. S2.3 – Influence Plot for the Association of Obesity with COVID-19 Mortality**

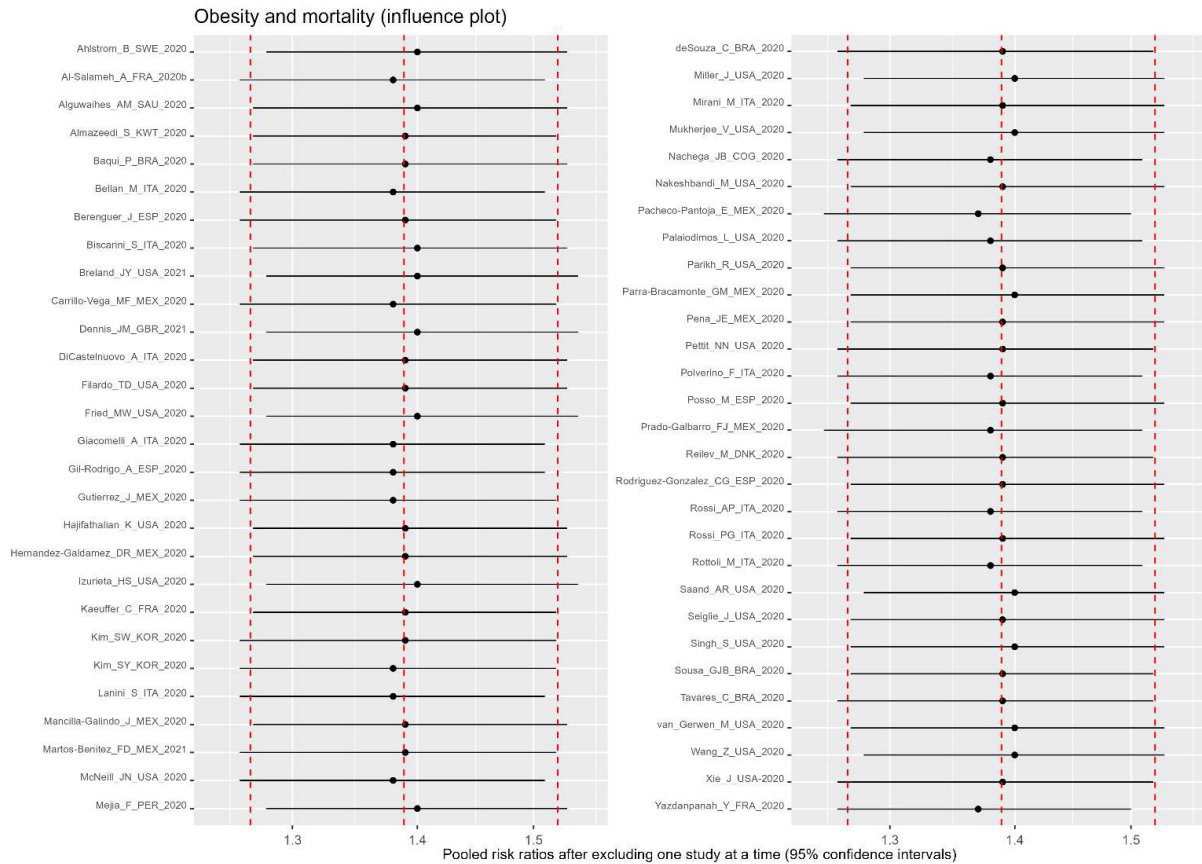

## Supplementary Tables

**Table S1** – Overall Pooled Effect Estimates for the Association of Diabetes, Hypertension, and Obesity with COVID-19 Mortality

| Exposure     | Effect Estimate    | N   | PRR* (95% CI)     | $\tau^2$ (95% CI) | $I^2$ (95% CI)    |
|--------------|--------------------|-----|-------------------|-------------------|-------------------|
| Diabetes     | Unadjusted         | 54  | 2.13 (1.80, 2.52) | 0.31 (0.21, 0.53) | 0.99 (0.99, 0.99) |
| Diabetes     | Adjusted (overall) | 118 | 1.43 (1.32, 1.54) | 0.12 (0.10, 0.21) | 0.94 (0.93, 0.95) |
| Diabetes     | Adjusted (OR)      | 63  | 1.59 (1.40, 1.81) | 0.17 (0.12, 0.34) | 0.96 (0.95, 0.96) |
| Diabetes     | Adjusted (HR/RR)   | 55  | 1.24 (1.15, 1.32) | 0.02 (0.01, 0.11) | 0.79 (0.73, 0.84) |
| Hypertension | Unadjusted         | 43  | 2.07 (1.74, 2.47) | 0.28 (0.18, 0.47) | 0.99 (0.99, 0.99) |
| Hypertension | Adjusted (overall) | 99  | 1.19 (1.09, 1.30) | 0.12 (0.09, 0.21) | 0.91 (0.89, 0.92) |
| Hypertension | Adjusted (OR)      | 60  | 1.19 (1.04, 1.35) | 0.17 (0.11, 0.33) | 0.91 (0.89, 0.92) |
| Hypertension | Adjusted (HR/RR)   | 39  | 1.18 (1.06, 1.30) | 0.06 (0.03, 0.16) | 0.91 (0.89, 0.93) |
| Obesity      | Unadjusted         | 28  | 1.45 (1.22, 1.71) | 0.12 (0.07, 0.32) | 0.85 (0.80, 0.89) |
| Obesity      | Adjusted (overall) | 57  | 1.39 (1.27, 1.52) | 0.06 (0.04, 0.18) | 0.96 (0.96, 0.97) |
| Obesity      | Adjusted (OR)      | 30  | 1.46 (1.29, 1.65) | 0.06 (0.03, 0.24) | 0.98 (0.97, 0.98) |
| Obesity      | Adjusted (HR/RR)   | 27  | 1.31 (1.14, 1.51) | 0.06 (0.03, 0.24) | 0.77 (0.66, 0.84) |

Note: \* PRR = pooled risk ratio.  $\tau^2$  = a measure of between-study variance;  $I^2$  = a statistic of the proportion of total variability explained by between-study variance. Estimates are from random-effects meta-analysis using restricted maximum likelihood method and Hartung-Knapp-Sidik-Jonkman adjusting for the standard errors.

HR = hazard ratio; OR = odds ratio; RR = relative risk.



**Table S2.1** – Pooled Effect Estimates for the Association between Diabetes and COVID-19 Mortality by Subgroups

| Study- or Country-Level Variable | Subgroups                  | N  | PRR* (95% CI)     | $\tau^2$ (95% CI) | $I^2$ (95% CI)    |
|----------------------------------|----------------------------|----|-------------------|-------------------|-------------------|
| Type of risk ratio               | OR                         | 63 | 1.59 (1.40, 1.81) | 0.17 (0.12, 0.34) | 0.96 (0.95, 0.96) |
|                                  | HR                         | 48 | 1.26 (1.17, 1.36) | 0.02 (0.01, 0.13) | 0.73 (0.64, 0.79) |
|                                  | RR                         | 7  | 1.08 (0.94, 1.24) | 0.01 (0.00, 0.15) | 0.36 (0.00, 0.73) |
| Study period                     | May 2020 - November 2020   | 48 | 1.38 (1.26, 1.51) | 0.07 (0.05, 0.15) | 0.97 (0.96, 0.97) |
|                                  | December 2019 - April 2020 | 70 | 1.48 (1.31, 1.68) | 0.17 (0.12, 0.35) | 0.82 (0.78, 0.86) |
| Study design                     | Cohort                     | 90 | 1.37 (1.28, 1.46) | 0.05 (0.04, 0.13) | 0.79 (0.75, 0.83) |
|                                  | Other                      | 28 | 1.53 (1.20, 1.96) | 0.31 (0.20, 0.76) | 0.98 (0.97, 0.98) |
| Study quality                    | Low                        | 8  | 1.56 (0.70, 3.49) | 0.71 (0.26, 4.23) | 0.87 (0.76, 0.93) |
|                                  | Medium                     | 54 | 1.50 (1.32, 1.70) | 0.16 (0.11, 0.31) | 0.96 (0.96, 0.97) |
|                                  | High                       | 56 | 1.30 (1.21, 1.40) | 0.02 (0.01, 0.11) | 0.79 (0.73, 0.84) |
| WHO region                       | EMR                        | 9  | 1.31 (0.99, 1.72) | 0.05 (0.00, 0.35) | 0.38 (0.00, 0.72) |
|                                  | EUR                        | 32 | 1.35 (1.19, 1.53) | 0.07 (0.04, 0.21) | 0.93 (0.91, 0.94) |
|                                  | AMR                        | 46 | 1.27 (1.17, 1.37) | 0.05 (0.03, 0.08) | 0.95 (0.95, 0.96) |
|                                  | AFR/SEAR                   | 4  | 1.32 (0.81, 2.15) | 0.00 (0.00, 2.11) | 0.06 (0.00, 0.86) |
|                                  | WPR                        | 26 | 2.26 (1.76, 2.89) | 0.24 (0.10, 0.57) | 0.85 (0.80, 0.89) |
|                                  | WPR -China                 | 18 | 2.42 (1.64, 3.56) | 0.41 (0.15, 1.05) | 0.90 (0.85, 0.93) |
| WB income level                  | -South Korea               | 8  | 2.15 (1.79, 2.60) | 0.00 (0.00, 0.15) | 0.00 (0.00, 0.68) |
|                                  | High                       | 72 | 1.30 (1.21, 1.40) | 0.05 (0.03, 0.11) | 0.93 (0.92, 0.94) |
|                                  | Upper middle               | 41 | 1.65 (1.38, 1.97) | 0.22 (0.14, 0.49) | 0.95 (0.94, 0.96) |
| Health index score tertile       | Lower middle               | 3  | 1.44 (0.47, 4.38) | 0.07 (0.00, 8.80) | 0.36 (0.00, 0.79) |
|                                  | 1 <sup>st</sup>            | 39 | 1.29 (1.18, 1.41) | 0.06 (0.03, 0.11) | 0.96 (0.95, 0.97) |
|                                  | 2 <sup>nd</sup>            | 39 | 1.28 (1.17, 1.42) | 0.04 (0.02, 0.12) | 0.93 (0.91, 0.94) |
| GHSI score tertile               | 3 <sup>rd</sup>            | 38 | 1.87 (1.55, 2.27) | 0.24 (0.13, 0.47) | 0.86 (0.82, 0.89) |
|                                  | 1 <sup>st</sup>            | 39 | 1.66 (1.35, 2.04) | 0.27 (0.15, 0.54) | 0.89 (0.86, 0.92) |
|                                  | 2 <sup>nd</sup>            | 39 | 1.44 (1.29, 1.60) | 0.07 (0.04, 0.18) | 0.93 (0.91, 0.94) |
|                                  | 3 <sup>rd</sup>            | 38 | 1.24 (1.15, 1.35) | 0.03 (0.02, 0.08) | 0.96 (0.95, 0.97) |

Note: \* PRR = pooled risk ratio.  $\tau^2$  = a measure of between-study variance;  $I^2$  = a statistic of the proportion of total variability explained by between-study variance. Estimates are from random-effects meta-analysis using restricted maximum likelihood method and Hartung-Knapp-Sidik-Jonkman adjusting for the standard errors.

HR = hazard ratio; OR = odds ratio; RR = relative risk; GHSI = Global Health Security Index.

**Table S2.2** – Pooled Effect Estimates for the Association between Hypertension and COVID-19 Mortality by Subgroups

| Study- or Country-Level Variable | Subgroups                  | N  | PRR* (95% CI)     | $\tau^2$ (95% CI) | $I^2$ (95% CI)    |
|----------------------------------|----------------------------|----|-------------------|-------------------|-------------------|
| Type of risk ratio               | OR                         | 60 | 1.19 (1.04, 1.35) | 0.17 (0.11, 0.33) | 0.91 (0.89, 0.92) |
|                                  | HR                         | 35 | 1.19 (1.06, 1.33) | 0.06 (0.03, 0.18) | 0.92 (0.89, 0.93) |
|                                  | RR                         | 4  | 1.06 (0.65, 1.73) | 0.06 (0.00, 1.00) | 0.67 (0.03, 0.89) |
| Study period                     | May 2020 - November 2020   | 46 | 1.12 (1.04, 1.21) | 0.03 (0.02, 0.13) | 0.86 (0.82, 0.89) |
|                                  | December 2019 - April 2020 | 53 | 1.24 (1.07, 1.44) | 0.21 (0.13, 0.36) | 0.93 (0.91, 0.94) |
| Study design                     | Cohort                     | 78 | 1.17 (1.07, 1.27) | 0.07 (0.05, 0.18) | 0.87 (0.84, 0.89) |
|                                  | Other                      | 21 | 1.22 (0.95, 1.56) | 0.25 (0.13, 0.58) | 0.96 (0.95, 0.97) |
| Study quality                    | Low                        | 8  | 1.07 (0.60, 1.91) | 0.29 (0.07, 2.25) | 0.71 (0.40, 0.86) |
|                                  | Medium                     | 40 | 1.30 (1.10, 1.53) | 0.20 (0.13, 0.40) | 0.95 (0.94, 0.96) |
|                                  | High                       | 51 | 1.09 (1.01, 1.18) | 0.02 (0.01, 0.10) | 0.62 (0.49, 0.72) |
| WHO region                       | AMR                        | 41 | 1.11 (1.02, 1.21) | 0.04 (0.02, 0.13) | 0.89 (0.85, 0.91) |
|                                  | EUR                        | 27 | 1.13 (0.99, 1.30) | 0.07 (0.04, 0.21) | 0.94 (0.92, 0.95) |
|                                  | EMR                        | 5  | 0.92 (0.58, 1.47) | 0.00 (0.00, 0.54) | 0.00 (0.00, 0.79) |
|                                  | AFR/SEAR                   | 6  | 1.20 (0.74, 1.92) | 0.07 (0.00, 2.28) | 0.59 (0.00, 0.83) |
|                                  | WPR                        | 19 | 1.52 (1.08, 2.15) | 0.39 (0.17, 0.90) | 0.92 (0.88, 0.94) |
|                                  | WPR<br>-China              | 15 | 1.57 (1.01, 2.45) | 0.49 (0.20, 1.27) | 0.93 (0.89, 0.95) |
| WB income level                  | -South Korea               | 4  | 1.30 (0.71, 2.37) | 0.09 (0.00, 1.99) | 0.64 (0.00, 0.88) |
|                                  | High                       | 62 | 1.07 (0.99, 1.16) | 0.05 (0.03, 0.14) | 0.90 (0.88, 0.92) |
|                                  | Upper middle               | 31 | 1.42 (1.17, 1.71) | 0.20 (0.11, 0.42) | 0.91 (0.88, 0.93) |
| Health index score tertile       | Lower middle               | 4  | 1.06 (0.43, 2.60) | 0.05 (0.00, 7.90) | 0.47 (0.00, 0.82) |
|                                  | 1 <sup>st</sup>            | 33 | 1.16 (1.05, 1.28) | 0.04 (0.03, 0.15) | 0.89 (0.86, 0.92) |
|                                  | 2 <sup>nd</sup>            | 32 | 1.02 (0.92, 1.13) | 0.02 (0.01, 0.22) | 0.60 (0.40, 0.73) |
| GHSI score tertile               | 3 <sup>rd</sup>            | 32 | 1.38 (1.12, 1.69) | 0.24 (0.13, 0.46) | 0.92 (0.89, 0.94) |
|                                  | 1 <sup>st</sup>            | 33 | 1.29 (1.03, 1.61) | 0.28 (0.14, 0.52) | 0.90 (0.87, 0.92) |
|                                  | 2 <sup>nd</sup>            | 32 | 1.22 (1.10, 1.36) | 0.05 (0.03, 0.16) | 0.92 (0.90, 0.94) |
|                                  | 3 <sup>rd</sup>            | 32 | 1.01 (0.93, 1.10) | 0.02 (0.01, 0.19) | 0.62 (0.44, 0.74) |

Note: \* PRR = pooled risk ratio.  $\tau^2$  = a measure of between-study variance;  $I^2$  = a statistic of the proportion of total variability explained by between-study variance. Estimates are from random-effects meta-analysis using restricted maximum likelihood method and Hartung-Knapp-Sidik-Jonkman adjusting for the standard errors.

HR = hazard ratio; OR = odds ratio; RR = relative risk; GHSI = Global Health Security Index.

**Table S2.3** – Pooled Effect Estimates for the Association between Obesity and COVID-19 Mortality by Subgroups

| Study- or Country-Level Variable | Subgroups                  | N     | PRR* (95% CI)     | $\tau^2$ (95% CI) | $I^2$ (95% CI)    |
|----------------------------------|----------------------------|-------|-------------------|-------------------|-------------------|
| Type of risk ratio               | HR                         | 23    | 1.34 (1.13, 1.59) | 0.09 (0.04, 0.33) | 0.80 (0.71, 0.86) |
|                                  | OR                         | 30    | 1.46 (1.29, 1.65) | 0.06 (0.03, 0.24) | 0.98 (0.97, 0.98) |
|                                  | RR                         | 4     | 1.23 (1.03, 1.48) | 0.00 (0.00, 0.07) | 0.00 (0.00, 0.85) |
| Study period                     | May 2020 - November 2020   | 26    | 1.25 (1.14, 1.37) | 0.03 (0.01, 0.11) | 0.98 (0.98, 0.98) |
|                                  | December 2019 - April 2020 | 31    | 1.61 (1.38, 1.87) | 0.08 (0.04, 0.31) | 0.72 (0.60, 0.80) |
| Study design                     | Cohort                     | 44    | 1.43 (1.27, 1.62) | 0.08 (0.05, 0.26) | 0.91 (0.89, 0.93) |
|                                  | Other                      | 13    | 1.34 (1.18, 1.51) | 0.03 (0.01, 0.12) | 0.95 (0.93, 0.97) |
| Study quality                    | High                       | 28    | 1.46 (1.21, 1.77) | 0.12 (0.07, 0.51) | 0.78 (0.69, 0.85) |
|                                  | Medium                     | 27    | 1.36 (1.24, 1.50) | 0.04 (0.02, 0.08) | 0.98 (0.98, 0.98) |
|                                  | Low                        | 2     | -                 | -                 | -                 |
| WHO region                       | EUR                        | 20    | 1.63 (1.32, 2.01) | 0.10 (0.04, 0.44) | 0.75 (0.61, 0.84) |
|                                  | EMR                        | 2     | -                 | -                 | -                 |
|                                  | AMR                        | 32    | 1.31 (1.19, 1.45) | 0.05 (0.03, 0.12) | 0.98 (0.97, 0.98) |
|                                  | WPR                        | 2     | -                 | -                 | -                 |
|                                  | AFR/SEAR                   | 1     | -                 | -                 | -                 |
|                                  | WPR                        | China | 0                 | -                 | -                 |
| WB income group                  | South Korea                | 2     | -                 | -                 | -                 |
|                                  | High                       | 42    | 1.34 (1.18, 1.52) | 0.07 (0.05, 0.28) | 0.75 (0.66, 0.81) |
|                                  | Upper middle               | 14    | 1.49 (1.33, 1.67) | 0.03 (0.01, 0.09) | 0.94 (0.91, 0.96) |
| Health index score tertile       | Lower middle               | 1     | -                 | -                 | -                 |
|                                  | 1 <sup>st</sup>            | 19    | 1.42 (1.27, 1.58) | 0.04 (0.02, 0.09) | 0.99 (0.98, 0.99) |
|                                  | 2 <sup>nd</sup>            | 19    | 1.17 (0.99, 1.38) | 0.04 (0.02, 0.41) | 0.64 (0.41, 0.78) |
|                                  | 3 <sup>rd</sup>            | 19    | 1.67 (1.36, 2.06) | 0.07 (0.02, 0.41) | 0.53 (0.20, 0.72) |
| GHSI score tertile               | 1 <sup>st</sup>            | 19    | 1.55 (1.26, 1.92) | 0.06 (0.02, 0.60) | 0.58 (0.31, 0.75) |
|                                  | 2 <sup>nd</sup>            | 19    | 1.54 (1.38, 1.72) | 0.03 (0.01, 0.14) | 0.91 (0.88, 0.94) |
|                                  | 3 <sup>rd</sup>            | 19    | 1.09 (1.01, 1.17) | 0.00 (0.00, 0.19) | 0.63 (0.40, 0.78) |

Note: \* PRR = pooled risk ratio.  $\tau^2$  = a measure of between-study variance;  $I^2$  = a statistic of the proportion of total variability explained by between-study variance. Estimates are from random-effects meta-analysis using restricted maximum likelihood method and Hartung-Knapp-Sidik-Jonkman adjusting for the standard errors.

HR = hazard ratio; OR = odds ratio; RR = relative risk; GHSI = Global Health Security Index.

**Table S3** – Characteristics of Studies Included in the Meta-Analysis on the Associations of Diabetes, Hypertension, and Obesity with COVID-19 Mortality, December 2019 – December, 2020 (n=145)

| Study ID                                | Country                          | WHO region | WB income level | Health index score | GHSI score | Start date | End date  | Data source | Study design | Exposure                        |     |     | Sample size | Mean age, y | Men, % | Effect estimate type | Funding source | NOS score |
|-----------------------------------------|----------------------------------|------------|-----------------|--------------------|------------|------------|-----------|-------------|--------------|---------------------------------|-----|-----|-------------|-------------|--------|----------------------|----------------|-----------|
|                                         |                                  |            |                 |                    |            |            |           |             |              | DM                              | HTN | OB  |             |             |        |                      |                |           |
|                                         |                                  |            |                 |                    |            |            |           |             |              | Agarwal_S_USA_2020 <sup>1</sup> | USA | AMR |             |             |        |                      |                |           |
| Ahlstrom_B_SWE_2020 <sup>2</sup>        | Sweden                           | EUR        | HI              | 82.1               | 66.4       | 1/31/2020  | 5/27/2020 | ARS         | Cohort       | No                              | Yes | Yes | 9,905       | 61.0        | 74.0   | HR                   | Independent    | 9         |
| Al_Wahaibi_A_OMN_2020 <sup>3</sup>      | Oman                             | EMR        | HI              | 75.2               | 40.9       | 2/24/2020  | 7/19/2020 | ARS         | C-S          | Yes                             | Yes | No  | 68,967      | 40.0        | 74.9   | OR                   | None or NA     | 4         |
| Alguwaihes_AM_SAU_2020 <sup>4</sup>     | Saudi Arabia                     | EMR        | HI              | 74.5               | 45.0       | 5/15/2020  | 7/15/2020 | EHR         | C-S          | Yes                             | Yes | Yes | 439         | 55.0        | 68.3   | HR                   | Independent    | 7         |
| Allameh_SF_IRN_2020 <sup>5</sup>        | Iran                             | EMR        | UMI             | 74.8               | 39.5       | 2/20/2020  | 3/19/2020 | EHR         | Cohort       | Yes                             | Yes | No  | 396         | 56.9        | 61.8   | RR                   | Not reported   | 8         |
| Almazeedi_S_KWT_2020 <sup>6</sup>       | Kuwait                           | EMR        | HI              | 76.9               | 40.1       | 2/24/2020  | 4/20/2020 | EHR         | Cohort       | Yes                             | Yes | Yes | 1,096       | 41.0        | 81.0   | OR                   | Independent    | 9         |
| Al-Salameh_A_FRA_2020a <sup>7</sup>     | France                           | EUR        | HI              | 80.5               | 62.6       | 10/1/2020  | 4/21/2020 | EHR         | Cohort       | Yes                             | No  | No  | 432         | 73.0        | 55.1   | HR                   | None or NA     | 9         |
| Al-Salameh_A_FRA_2020b <sup>8</sup>     | France                           | EUR        | HI              | 80.5               | 62.6       | 1/24/2020  | 5/1/2020  | EHR         | Cohort       | No                              | No  | Yes | 329         | 81.0        | 59.6   | OR                   | Not reported   | 9         |
| Amit_M_ISR_2020 <sup>9</sup>            | Israel                           | EUR        | HI              | 82.8               | 50.7       | 3/5/2020   | 4/27/2020 | EHR         | Cohort       | Yes                             | Yes | No  | 156         | 72.0        | 69.0   | OR                   | None or NA     | 9         |
| Baqui_P_BRA_2020 <sup>10</sup>          | Brazil                           | AMR        | UMI             | 72.0               | 51.0       | 2/27/2020  | 5/4/2020  | ARS         | C-S          | Yes                             | No  | Yes | 7,371       | 55.2        | 45.5   | HR                   | None or NA     | 8         |
| Barron_E_GBR_2020 <sup>11</sup>         | UK                               | EUR        | HI              | 78.8               | 68.3       | 3/1/2020   | 5/11/2020 | ARS         | C-S          | Yes                             | No  | No  | 61,414,470* | 40.9        | 49.9   | OR                   | None or NA     | 8         |
| Bellan_M_ITA_2020 <sup>12</sup>         | Italy                            | EUR        | HI              | 81.1               | 51.9       | 3/1/2020   | 4/28/2020 | EHR         | Cohort       | No                              | No  | Yes | 407         | 71.0        | 59.0   | OR                   | None or NA     | 9         |
| Bepouka_BI_COD_2020 <sup>13</sup>       | D.R. Congo                       | AFR        | LMI             | 48.6               | 26.0       | 3/23/2020  | 6/15/2020 | EHR         | Cohort       | Yes                             | Yes | No  | 141         | 49.6        | 67.4   | HR                   | Not reported   | 9         |
| Berenguer_J_ESP_2020 <sup>14</sup>      | Spain                            | EUR        | HI              | 80.5               | 60.4       | 1/31/2020  | 3/17/2020 | EHR         | Cohort       | No                              | Yes | Yes | 4,035       | 70.0        | 61.0   | HR                   | Independent    | 9         |
| Bhargava_A_USA_2020 <sup>15</sup>       | USA                              | AMR        | HI              | 73.9               | 76.2       | 3/8/2020   | 6/14/2020 | EHR         | Cohort       | No                              | Yes | No  | 265         | 50.4        | 52.8   | OR                   | None or NA     | 4         |
| Biscarini_S_ITA_2020 <sup>16</sup>      | Italy                            | EUR        | HI              | 81.1               | 51.9       | 2/21/2020  | 3/31/2020 | ARS         | Cohort       | Yes                             | Yes | Yes | 427         | 67.0        | 68.1   | HR                   | Independent    | 9         |
| Boulle_A_ZAF_2020 <sup>17</sup>         | South Africa                     | AFR        | UMI             | 56.6               | 47.5       | 3/1/2020   | 6/9/2020  | ARS         | Cohort       | No                              | Yes | No  | 2,978       | 53.4        | 37.9   | HR                   | Independent    | 9         |
| Breland_JY_USA_2021 <sup>18</sup>       | USA                              | AMR        | HI              | 73.9               | 76.2       | 3/2/2020   | 5/20/2020 | EHR         | Cohort       | No                              | No  | Yes | 9,347       | 65.0        | 91.0   | OR                   | Independent    | 8         |
| Cai_Y_CHN_2020 <sup>19</sup>            | China                            | WPR        | UMI             | 82.8               | 49.0       | 1/20/2020  | 3/3/2020  | EHR         | Cohort       | Yes                             | Yes | No  | 941         | 57.0        | 48.0   | HR                   | Independent    | 9         |
| Cao_Y_CHN_2020 <sup>20</sup>            | China                            | WPR        | UMI             | 82.8               | 49.0       | 1/5/2020   | 2/22/2020 | EHR         | C-S          | Yes                             | Yes | No  | 101         | 56.6        | 66.3   | OR                   | Independent    | 8         |
| Carrillo-Vega_MF_MEX_2020 <sup>21</sup> | Mexico                           | AMR        | UMI             | 72.1               | 55.1       | 2/28/2020  | 4/23/2020 | ARS         | C-S          | Yes                             | Yes | Yes | 9,946       | 48.2        | 57.8   | OR                   | Independent    | 7         |
| Cernigliaro_A_ITA_2020 <sup>22</sup>    | Italy                            | EUR        | HI              | 81.1               | 51.9       | 1/3/2020   | 6/26/2020 | ARS         | C-S          | Yes                             | No  | No  | 2,847       | 50.0        | 49.5   | OR                   | Not reported   | 5         |
| Chang_MC_KOR_2020 <sup>23</sup>         | South Korea                      | WPR        | HI              | 84.1               | 65.9       | 2/1/2020   | 4/10/2020 | EHR         | Cohort       | Yes                             | No  | No  | 106         | 67.6        | 50.1   | HR                   | Independent    | 9         |
| Cheng_X_CHN_2020 <sup>24</sup>          | China                            | WPR        | UMI             | 82.8               | 49.0       | 1/11/2020  | 2/20/2020 | ARS         | Cohort       | Yes                             | Yes | No  | 220         | 59.5        | 48.2   | HR                   | Independent    | 8         |
| Chilimuri_S_USA_2020 <sup>25</sup>      | USA                              | AMR        | HI              | 73.9               | 76.2       | 3/9/2020   | 4/9/2020  | EHR         | Cohort       | Yes                             | Yes | No  | 375         | 63.0        | 63.0   | OR                   | None or NA     | 9         |
| Ciardullo_S_ITA_2020 <sup>26</sup>      | Italy                            | EUR        | HI              | 81.1               | 51.9       | 2/22/2020  | 5/15/2020 | EHR         | Cohort       | Yes                             | Yes | No  | 373         | 72.0        | 65.4   | RR                   | None or NA     | 9         |
| COVID-ICU-Group_FRA_2021 <sup>27</sup>  | France, Switzerland, and Belgium | EUR        |                 |                    |            | 2/25/2020  | 5/4/2020  | EHR         | Cohort       | Yes                             | Yes | No  | 4,244       | 63.0        | 74.0   | HR                   | Independent    | 9         |

|                                              |             |      |     |      |      |            |           |     |        |     |     |     |             |      |      |    |              |   |
|----------------------------------------------|-------------|------|-----|------|------|------------|-----------|-----|--------|-----|-----|-----|-------------|------|------|----|--------------|---|
| Cummings_MJ_USA_2020 <sup>28</sup>           | USA         | AMR  | HI  | 73.9 | 76.2 | 3/2/2020   | 4/1/2020  | EHR | Cohort | Yes | Yes | No  | 257         | 62.0 | 67.0 | HR | Independent  | 9 |
| Dennis_JM_GBR_2021 <sup>29</sup>             | UK          | EUR  | HI  | 78.8 | 68.3 | 3/1/2020   | 7/27/2020 | ARS | Cohort | Yes | Yes | Yes | 19,256      | 67.0 | 60.1 | HR | Independent  | 9 |
| deSouza_C_BRA_2020 <sup>30</sup>             | Brazil      | AMR  | UMI | 72.0 | 51.0 | 7/26/2020  | 8/1/2020  | ARS | Cohort | Yes | Yes | Yes | 9,807       | 70.2 | 47.5 | OR | Not reported | 8 |
| DiCastellnuovo_A_ITA_2020 <sup>31</sup>      | Italy       | EUR  | HI  | 81.1 | 51.9 | 2/19/2020  | 5/23/2020 | EHR | Cohort | Yes | Yes | Yes | 3,894       | 67.0 | 61.7 | HR | None or NA   | 9 |
| Eshrati_B_IRN_2020 <sup>32</sup>             | Iran        | EMR  | UM  | 74.8 | 39.5 | 2/22/2020  | 3/25/2020 | ARS | Cohort | Yes | No  | No  | 3,188       | 55.1 | 60.4 | HR | Independent  | 9 |
| Filardo_TD_USA_2020 <sup>33</sup>            | USA         | AMR  | HI  | 73.9 | 76.2 | 3/9/2020   | 4/8/2020  | EHR | Cohort | Yes | No  | Yes | 270         | 58.0 | 67.4 | RR | None or NA   | 8 |
| Fox_T_USA_2020 <sup>34</sup>                 | USA         | AMR  | HI  | 73.9 | 76.2 | 3/1/2020   | 4/24/2020 | EHR | C-S    | No  | Yes | No  | 355         | 66.2 | 51.0 | OR | None or NA   | 8 |
| Fried_MW_USA_2020 <sup>35</sup>              | USA         | AMR  | HI  | 73.9 | 76.2 | 2/15/2020  | 4/20/2020 | ARS | C-S    | Yes | Yes | Yes | 11,721      | 65.0 | 53.4 | OR | Industry     | 7 |
| Fumagalli_C_ITA_2020 <sup>36</sup>           | Italy       | EUR  | HI  | 81.1 | 51.9 | 2/22/2020  | 4/10/2020 | EHR | Cohort | Yes | Yes | No  | 516         | 67.0 | 66.9 | HR | None or NA   | 8 |
| Galloway_JB_GBR_2020 <sup>37</sup>           | UK          | EUR  | HI  | 78.8 | 68.3 | 3/1/2020   | 4/17/2020 | EHR | Cohort | Yes | Yes | No  | 1,157       | 71.0 | 57.6 | HR | None or NA   | 9 |
| Giacomelli_A_ITA_2020 <sup>38</sup>          | Italy       | EUR  | HI  | 81.1 | 51.9 | 2/21/2020  | 4/20/2020 | EHR | Cohort | No  | No  | Yes | 233         | 61.0 | 69.1 | HR | None or NA   | 9 |
| Gil-Rodrigo_A_ESP_2020 <sup>39</sup>         | Spain       | EUR  | HI  | 80.5 | 60.4 | 3/1/2020   | 4/30/2020 | EHR | Cohort | Yes | Yes | Yes | 1,000       | 62.3 | 56.2 | OR | None or NA   | 6 |
| Goodman_KE_USA_2020 <sup>40</sup>            | USA         | AMR  | HI  | 73.9 | 76.2 | 4/15/2020  | 6/15/2020 | ARS | Cohort | Yes | No  | No  | 66,646      | 62.8 | 52.9 | RR | Independent  | 9 |
| Grasselli_G_ITA_2020 <sup>41</sup>           | Italy       | EUR  | HI  | 81.1 | 51.9 | 2/20/2020  | 5/30/2020 | EHR | Cohort | Yes | Yes | No  | 3,988       | 63.0 | 80.0 | HR | Independent  | 9 |
| Gupta_S_USA_2020 <sup>42</sup>               | USA         | AMR  | HI  | 73.9 | 76.2 | 3/4/2020   | 4/4/2020  | EHR | Cohort | Yes | Yes | No  | 2,215       | 60.5 | 64.8 | OR | Independent  | 8 |
| Gutierrez_J_MEX_2020 <sup>43</sup>           | Mexico      | AMR  | UMI | 72.1 | 55.1 | 2/28/2020  | 9/16/2020 | ARS | C-S    | Yes | Yes | Yes | 654,858     | 46.1 | 52.2 | OR | None or NA   | 8 |
| Haase_N_DNK_2020 <sup>44</sup>               | Denmark     | EUR  | HI  | 80.6 | 67.3 | 3/10/2020  | 6/16/2020 | EHR | Cohort | No  | Yes | No  | 323         | 68.0 | 74.0 | HR | Industry     | 9 |
| Hajifathalian_K_USA_2020 <sup>45</sup>       | USA         | AMR  | HI  | 73.9 | 76.2 | 3/4/2020   | 4/9/2020  | EHR | Cohort | No  | No  | Yes | 770         | 63.5 | 60.8 | RR | Not reported | 9 |
| Harrison_SL_USA_2020 <sup>46</sup>           | USA         | AMR  | HI  | 73.9 | 76.2 | 1/20/2020  | 5/26/2020 | EHR | Cohort | Yes | No  | No  | 31,461      | 50.0 | 45.5 | OR | Independent  | 8 |
| Hernandez-Galdamez_DR_MEX_2020 <sup>47</sup> | Mexico      | AMR  | UMI | 72.1 | 55.1 | 2/15/2020  | 6/27/2020 | ARS | C-S    | Yes | Yes | Yes | 211,003     | 45.7 | 54.7 | OR | Not reported | 8 |
| Huang_S_CHN_2020 <sup>48</sup>               | China       | WPR  | UMI | 82.8 | 49.0 | 12/30/2019 | 4/19/2020 | EHR | Cohort | No  | Yes | No  | 310         | 62.0 | 56.0 | OR | Not reported | 9 |
| Hui_Y_CHN_2020 <sup>49</sup>                 | China       | WPR  | UMI | 82.8 | 49.0 | 1/28/2020  | 3/10/2020 | EHR | Cohort | Yes | No  | No  | 167         | 65.0 | 65.3 | HR | Independent  | 9 |
| Iaccarino_G_ITA_2020 <sup>50</sup>           | Italy       | EUR  | HI  | 81.1 | 51.9 | 3/9/2020   | 4/9/2020  | ARS | C-S    | Yes | Yes | No  | 1,591       | 66.5 | 64.0 | OR | Independent  | 7 |
| Ioannou_GN_USA_2020 <sup>51</sup>            | USA         | AMR  | HI  | 73.9 | 76.2 | 2/28/2020  | 5/14/2020 | EHR | Cohort | Yes | Yes | No  | 10,131      | 63.6 | 91.0 | HR | Independent  | 9 |
| Izurieta_HS_USA_2020 <sup>52</sup>           | USA         | AMR  | HI  | 73.9 | 76.2 | 4/1/2020   | 5/8/2020  | ARS | C-S    | Yes | Yes | Yes | 25,333,329+ | 73.0 | 44.0 | OR | Independent  | 8 |
| Jackson_BR_USA_2020 <sup>53</sup>            | USA         | AMR  | HI  | 73.9 | 76.2 | 3/1/2020   | 3/31/2020 | EHR | Cohort | Yes | Yes | No  | 297         | 60.0 | 50.0 | OR | Independent  | 9 |
| Jain_AC_IND_2020 <sup>54</sup>               | INDIA       | SEAR | LMI | 67.1 | 43.6 | 4/15/2020  | 6/15/2020 | EHR | Cohort | Yes | Yes | No  | 425         | 49.0 | 73.4 | OR | None or NA   | 7 |
| Jiang_Y_CHN_2020 <sup>55</sup>               | China       | WPR  | UMI | 82.8 | 49.0 | 1/30/2020  | 4/10/2020 | EHR | Cohort | Yes | Yes | No  | 281         | 70.0 | 50.9 | OR | Independent  | 9 |
| Kaeuffer_C_FRA_2020 <sup>56</sup>            | France      | EUR  | HI  | 80.5 | 62.6 | 3/20/2020  | 3/20/2020 | EHR | Cohort | Yes | Yes | Yes | 1,045       | 66.0 | 59.0 | OR | Independent  | 7 |
| Kim_DW_KOR_2020 <sup>57</sup>                | South Korea | WPR  | HI  | 84.1 | 65.9 | 1/20/2020  | 3/26/2020 | ARS | C-S    | Yes | Yes | No  | 9,148       | 46.0 | 39.0 | OR | Independent  | 7 |
| Kim_SW_KOR_2020 <sup>58</sup>                | South Korea | WPR  | HI  | 84.1 | 65.9 | 2/18/2020  | 7/10/2020 | EHR | Cohort | Yes | Yes | Yes | 2,254       | 57.0 | 35.8 | HR | Independent  | 8 |
| Kim_SY_KOR_2020 <sup>59</sup>                | South Korea | WPR  | HI  | 84.1 | 65.9 | 1/20/2020  | 4/30/2020 | ARS | Cohort | No  | No  | Yes | 4,057       | 50.0 | 42.5 | HR | Independent  | 8 |
| Kim_T_USA_2020 <sup>60</sup>                 | USA         | AMR  | HI  | 73.9 | 76.2 | 3/1/2020   | 5/12/2020 | EHR | Cohort | Yes | Yes | No  | 10,861      | 65.0 | 59.6 | OR | Independent  | 9 |
| Klang_E_USA_2020 <sup>61</sup>               | USA         | AMR  | HI  | 73.9 | 76.2 | 3/1/2020   | 5/17/2020 | EHR | Cohort | Yes | Yes | No  | 572         | 60.0 | 69.4 | OR | Not reported | 9 |

|                                            |             |       |     |      |      |            |            |     |        |     |     |     |         |      |      |    |              |   |
|--------------------------------------------|-------------|-------|-----|------|------|------------|------------|-----|--------|-----|-----|-----|---------|------|------|----|--------------|---|
| Kocayigit_I_TUR_2020 <sup>62</sup>         | Turkey      | EUR   | UMI | 75.1 | 49.8 | 3/20/2020  | 4/10/2020  | EHR | Cohort | Yes | No  | No  | 169     | 65.8 | 46.7 | OR | Not reported | 7 |
| Kunal_S_IND_2020 <sup>63</sup>             | India       | SEAR  | LMI | 67.1 | 43.6 | 1/30/2020  | 5/7/2020   | EHR | Cohort | No  | Yes | No  | 108     | 51.2 | 64.8 | OR | None or NA   | 5 |
| Lanini_S_ITA_2020 <sup>64</sup>            | Italy       | EUR   | HI  | 81.1 | 51.9 | 1/29/2020  | 3/28/2020  | EHR | Cohort | No  | No  | Yes | 379     | 61.7 | 72.0 | OR | Independent  | 9 |
| Lee_SG_KOR_2020 <sup>65</sup>              | South Korea | WPR   | HI  | 84.1 | 65.9 | 3/26/2020  | 5/15/2020  | ARS | C-S    | Yes | Yes | No  | 7,339   | 47.1 | 40.1 | OR | None or NA   | 7 |
| Li_H_CHN_2020 <sup>66</sup>                | China       | WPR   | UMI | 82.8 | 49.0 | 1/22/2020  | 3/17/2020  | EHR | Cohort | Yes | No  | No  | 453     | 61.0 | 52.0 | HR | Independent  | 8 |
| Liu_J_CHN_2020 <sup>67</sup>               | China       | WPR   | UMI | 82.8 | 49.0 | 12/29/2019 | 2/28/2020  | EHR | Cohort | Yes | No  | No  | 1,190   | 57.0 | 53.4 | OR | None or NA   | 7 |
| Liu_M_CHN_2020 <sup>68</sup>               | China       | WPR   | UMI | 82.8 | 49.0 | 1/1/2020   | 3/4/2020   | EHR | Cohort | Yes | No  | No  | 665     | 58.0 | 47.8 | OR | Independent  | 9 |
| Liu_Z_CHN_2020 <sup>69</sup>               | China       | WPR   | UMI | 82.8 | 49.0 | 2/8/2020   | 4/15/2020  | EHR | Cohort | Yes | No  | No  | 934     | 62.0 | 48.6 | HR | None or NA   | 9 |
| Mancilla-Galindo_J_MEX_2020 <sup>70</sup>  | Mexico      | AMR   | UMI | 72.1 | 55.1 | 2/28/2020  | 5/30/2020  | ARS | Cohort | Yes | Yes | Yes | 83,779  | 46.3 | 56.6 | HR | None or NA   | 9 |
| Mansour_A_IRN_2020 <sup>71</sup>           | Iran        | EMR   | UMI | 74.8 | 39.5 | 2/25/2020  | 4/21/2020  | EHR | C-S    | Yes | No  | No  | 353     | 61.7 | 57.5 | OR | None or NA   | 7 |
| Martos-Benitez_FD_MEX_2021 <sup>72</sup>   | Mexico      | AMR   | UMI | 72.1 | 55.1 | 1/1/2020   | 5/13/2020  | ARS | C-S    | Yes | Yes | Yes | 38,324  | 46.9 | 58.3 | OR | None or NA   | 7 |
| McNeill_JN_USA_2020 <sup>73</sup>          | USA         | AMR   | HI  | 73.9 | 76.2 | 2/28/2020  | 4/27/2020  | EHR | Cohort | No  | No  | Yes | 781     | 61.0 | 58.0 | OR | Independent  | 7 |
| Mejia_F_PER_2020 <sup>74</sup>             | Peru        | AMR   | UMI | 76.4 | 53.8 | 3/29/2020  | 6/11/2020  | OTH | Cohort | Yes | Yes | Yes | 369     | 59.0 | 65.3 | HR | None or NA   | 6 |
| Mikami_T_USA_2020 <sup>75</sup>            | USA         | AMR   | HI  | 73.9 | 76.2 | 3/12/2020  | 4/17/2020  | EHR | Cohort | Yes | Yes | No  | 3,708   | 66.0 | 57.0 | HR | Not reported | 6 |
| Miller_J_USA_2020 <sup>76</sup>            | USA         | AMR   | HI  | 73.9 | 76.2 | 3/7/2020   | 4/30/2020  | EHR | Cohort | Yes | Yes | Yes | 2,316   | 64.5 | 51.8 | OR | Independent  | 7 |
| Mirani_M_ITA_2020 <sup>77</sup>            | Italy       | EUR   | HI  | 81.1 | 51.9 | 2/20/2020  | 4/9/2020   | EHR | Cohort | Yes | Yes | Yes | 387     | 66.0 | 66.7 | HR | Not reported | 8 |
| Moon_SJ_KOR_2020 <sup>78</sup>             | South Korea | WPR   | HI  | 84.1 | 65.9 | 1/20/2020  | 5/15/2020  | ARS | C-S    | Yes | No  | No  | 5,307   | 56.0 | 39.0 | OR | Independent  | 7 |
| Munoz_P_ESP_2020 <sup>79</sup>             | Spain       | EUR   | HI  | 80.5 | 60.4 | 3/1/2020   | 5/10/2020  | OTH | Cohort | No  | Yes | No  | 100     | 61.5 | 52.0 | OR | Independent  | 9 |
| Mukherjee_V_USA_2020 <sup>80</sup>         | USA         | AMR   | HI  | 73.9 | 76.2 | 3/10/2020  | 5/18/2020  | EHR | Cohort | Yes | Yes | Yes | 137     | 59.0 | 72.3 | HR | Not reported | 9 |
| Munblit_D_RUS_2020 <sup>81</sup>           | Russia      | EUR   | UMI | 71.6 | 47.1 | 4/8/2020   | 5/28/2020  | EHR | Cohort | Yes | Yes | No  | 3,480   | 56.0 | 50.5 | OR | Independent  | 7 |
| Nachega_IB_COG_2020 <sup>82</sup>          | D.R. Congo  | AFR   | LMI | 48.6 | 26.0 | 3/10/2020  | 7/31/2020  | ARS | Cohort | Yes | Yes | Yes | 766     | 46.0 | 65.3 | HR | Independent  | 9 |
| Nachtigall_I_DEU_2020 <sup>83</sup>        | Germany     | EUR   | HI  | 81.1 | 65.7 | 2/12/2020  | 6/12/2020  | OTH | Cohort | Yes | No  | No  | 1,904   | 73.0 | 51.5 | HR | Independent  | 9 |
| Nakeshbandi_M_USA_2020 <sup>84</sup>       | USA         | AMR   | HI  | 73.9 | 76.2 | 3/10/2020  | 4/13/2020  | EHR | Cohort | Yes | Yes | Yes | 504     | 68.0 | 53.0 | RR | Not reported | 9 |
| Nogueira_PJ_PRT_2020 <sup>85</sup>         | Portugal    | EUR   | HI  | 77.6 | 58.7 | 1/1/2020   | 4/21/2020  | ARS | C-S    | Yes | No  | No  | 20,293  | 52.1 | 41.3 | OR | None or NA   | 7 |
| Orioli_L_BEL_2020 <sup>86</sup>            | Belgium     | EUR   | HI  | 80.6 | 61.9 | 3/1/2020   | 5/6/2020   | ARS | C-S    | Yes | No  | No  | 192     | 67.0 | 50.0 | HR | None or NA   | 4 |
| Orwa_A_MYS_2020 <sup>87</sup>              | Worldwide   | World |     |      |      | 12/30/2019 | 4/21/2020  | ARS | C-S    | Yes | Yes | No  | 828     | 49.4 | 59.1 | OR | None or NA   | 6 |
| Pacheco-Pantoja_E_MEX_2020 <sup>88</sup>   | Mexico      | AMR   | UMI | 72.1 | 55.1 | 2/28/2020  | 4/30/2020  | ARS | Cohort | Yes | Yes | Yes | 19,224  | 46.6 | 58.2 | OR | Not reported | 7 |
| Palaiodimos_L_USA_2020 <sup>89</sup>       | USA         | AMR   | HI  | 73.9 | 76.2 | 3/9/2020   | 4/12/2020  | EHR | Cohort | Yes | No  | Yes | 200     | 64.0 | 49.0 | OR | None or NA   | 9 |
| Panagiotou_OA_USA_2021 <sup>90</sup>       | USA         | AMR   | HI  | 73.9 | 76.2 | 3/16/2020  | 9/15/2020  | EHR | Cohort | Yes | Yes | No  | 5,256   | 79.0 | 39.0 | OR | Independent  | 9 |
| Parikh_R_USA_2020 <sup>91</sup>            | USA         | AMR   | HI  | 73.9 | 76.2 | 3/1/2020   | 5/1/2020   | EHR | Cohort | No  | No  | Yes | 160     | 60.4 | 65.6 | OR | None or NA   | 9 |
| Park_BE_KOR_2021 <sup>92</sup>             | South Korea | WPR   | HI  | 84.1 | 65.9 | 2/15/2020  | 4/24/2020  | ARS | Cohort | Yes | Yes | No  | 2,269   | 55.5 | 36.0 | OR | Independent  | 9 |
| Park_JG_KOR_2020 <sup>93</sup>             | South Korea | WPR   | HI  | 84.1 | 65.9 | 2/20/2020  | 4/14/2020  | EHR | Cohort | Yes | No  | No  | 289     | 72.0 | 46.0 | HR | Independent  | 8 |
| Parra-Bracamonte_GM_MEX_2020 <sup>94</sup> | Mexico      | AMR   | UMI | 72.1 | 55.1 | 1/13/2020  | 7/17/2020  | ARS | Cohort | Yes | Yes | Yes | 331,298 | 44.0 | 53.8 | OR | Not reported | 8 |
| Pena_JE_MEX_2020 <sup>95</sup>             | Mexico      | AMR   | UMI | 72.1 | 55.1 | 2/28/2020  | 11/13/2020 | ARS | C-S    | Yes | Yes | Yes | 121,225 | 50.0 | 59.8 | OR | Not reported | 7 |

|                                               |              |      |     |      |      |            |           |     |        |     |     |     |        |      |      |    |              |   |
|-----------------------------------------------|--------------|------|-----|------|------|------------|-----------|-----|--------|-----|-----|-----|--------|------|------|----|--------------|---|
| Petrilli_CM_USA_2020 <sup>96</sup>            | USA          | AMR  | HI  | 73.9 | 76.2 | 3/1/2020   | 4/8/2020  | EHR | Cohort | Yes | Yes | No  | 5,279  | 54.0 | 49.5 | HR | Independent  | 9 |
| Pettit_NN_USA_2020 <sup>97</sup>              | USA          | AMR  | HI  | 73.9 | 76.2 | 3/1/2020   | 4/18/2020 | EHR | Cohort | Yes | Yes | Yes | 238    | 58.5 | 47.5 | OR | Not reported | 9 |
| Polverino_F_ITA_2020 <sup>98</sup>            | Italy        | EUR  | HI  | 81.1 | 51.9 | 3/25/2020  | 4/22/2020 | OTH | C-S    | Yes | Yes | Yes | 3,179  | 69.0 | 68.3 | OR | Independent  | 8 |
| Posso_M_ESP_2020 <sup>99</sup>                | Spain        | EUR  | HI  | 80.5 | 60.4 | 2/23/2020  | 5/12/2020 | EHR | Cohort | Yes | Yes | Yes | 834    | 78.2 | 46.5 | OR | None or NA   | 8 |
| Prado-Galbarro_FJ_MEX_2020 <sup>100</sup>     | Mexico       | AMR  | UMI | 72.1 | 55.1 | 2/27/2020  | 4/27/2020 | ARS | Cohort | Yes | Yes | Yes | 15,529 | 55.0 | 57.8 | HR | None or NA   | 9 |
| Qin_W_CHN_2020 <sup>101</sup>                 | China        | WPR  | UMI | 82.8 | 49.0 | 12/19/2019 | 2/20/2020 | EHR | Cohort | No  | Yes | No  | 582    | 64.0 | 50.3 | OR | Independent  | 6 |
| Qin_W_CHN_2021 <sup>102</sup>                 | China        | WPR  | UMI | 82.8 | 49.0 | 1/31/2020  | 3/6/2020  | EHR | Cohort | No  | Yes | No  | 262    | 63.5 | 46.9 | HR | Independent  | 9 |
| Rastad_H_IRN_2020 <sup>103</sup>              | Iran         | EMR  | UMI | 74.8 | 39.5 | 2/20/2020  | 3/25/2020 | EHR | Cohort | Yes | No  | No  | 2,957  | 54.8 | 53.7 | OR | Independent  | 8 |
| Reilev_M_DNK_2020 <sup>104</sup>              | Denmark      | EUR  | HI  | 80.6 | 67.3 | 2/27/2020  | 5/19/2020 | ARS | Cohort | Yes | Yes | Yes | 11,122 | 48.0 | 42.0 | OR | Independent  | 7 |
| Rethemiotaki_I_CHN_2020 <sup>105</sup>        | China        | WPR  | UMI | 82.8 | 49.0 | 12/19/2019 | 2/20/2020 | ARS | C-S    | Yes | Yes | No  | 44,672 | 55.0 | 64.0 | OR | Not reported | 7 |
| Rivera-Izquierdo_M_ESP_2020 <sup>106</sup>    | Spain        | EUR  | HI  | 80.5 | 60.4 | 3/16/2020  | 4/10/2020 | OTH | Cohort | Yes | No  | No  | 238    | 64.7 | 55.0 | HR | Independent  | 9 |
| Rodriguez-Gonzalez_CG_ESP_2020 <sup>107</sup> | Spain        | EUR  | HI  | 80.5 | 60.4 | 3/1/2020   | 3/24/2020 | OTH | Cohort | Yes | Yes | Yes | 1,208  | 65.0 | 58.0 | OR | Independent  | 9 |
| Rodriguez-Molinero_A_ESP_2020 <sup>108</sup>  | Spain        | EUR  | HI  | 80.5 | 60.4 | 3/12/2020  | 5/2/2020  | EHR | Cohort | Yes | Yes | No  | 418    | 65.4 | 57.0 | OR | None or NA   | 9 |
| Rodriguez-Nava_G_USA_2020 <sup>109</sup>      | USA          | AMR  | HI  | 73.9 | 76.2 | 3/1/2020   | 5/25/2020 | OTH | Cohort | No  | Yes | No  | 313    | 68.0 | 58.0 | HR | Not reported | 9 |
| Rosenthal_N_USA_2020 <sup>110</sup>           | USA          | AMR  | HI  | 73.9 | 76.2 | 4/1/2020   | 5/31/2020 | ARS | C-S    | Yes | Yes | No  | 64,781 | 57.0 | 49.0 | OR | Independent  | 7 |
| Rossi_AP_ITA_2020 <sup>111</sup>              | Italy        | EUR  | HI  | 81.1 | 51.9 | 3/8/2020   | 3/30/2020 | ARS | Cohort | No  | No  | Yes | 95     | 62.5 | 82.1 | HR | Not reported | 9 |
| Rossi_PG_ITA_2020 <sup>112</sup>              | Italy        | EUR  | HI  | 81.1 | 51.9 | 2/27/2020  | 4/2/2020  | ARS | Cohort | Yes | Yes | Yes | 2,653  | 63.2 | 50.1 | HR | Independent  | 9 |
| Rottoli_M_ITA_2020 <sup>113</sup>             | Italy        | EUR  | HI  | 81.1 | 51.9 | 3/1/2020   | 4/27/2020 | ARS | Cohort | Yes | Yes | Yes | 482    | 66.2 | 63.0 | HR | None or NA   | 9 |
| Rozaliyani_A_IDN_2020 <sup>114</sup>          | Indonesia    | SEAR | UMI | 72.7 | 49.2 | 3/2/2020   | 4/29/2020 | ARS | Cohort | Yes | Yes | No  | 4,052  | 45.8 | 54.0 | OR | Not reported | 9 |
| Saand_AR_USA_2020 <sup>115</sup>              | USA          | AMR  | HI  | 73.9 | 76.2 | 3/15/2020  | 5/30/2020 | ARS | Cohort | Yes | No  | Yes | 495    | 68.0 | 58.4 | HR | None or NA   | 9 |
| Salacup_G_USA_2020 <sup>116</sup>             | USA          | AMR  | HI  | 73.9 | 76.2 | 3/1/2020   | 4/24/2020 | EHR | Cohort | Yes | Yes | No  | 242    | 66.0 | 51.0 | OR | Not reported | 9 |
| Santos_MM_BRA_2020 <sup>117</sup>             | Brazil       | AMR  | UMI | 72.0 | 51.0 | 2/20/2020  | 6/2/2020  | ARS | Cohort | Yes | No  | No  | 80,123 | 51.0 | 57.0 | HR | Not reported | 9 |
| Seiglie_J_USA_2020 <sup>118</sup>             | USA          | AMR  | HI  | 73.9 | 76.2 | 3/11/2020  | 4/30/2020 | ARS | Cohort | Yes | Yes | Yes | 450    | 63.3 | 57.6 | OR | Independent  | 9 |
| Shah_C_USA_2020 <sup>119</sup>                | USA          | AMR  | HI  | 73.9 | 76.2 | 1/1/2020   | 5/31/2020 | EHR | Cohort | Yes | Yes | No  | 487    | 68.4 | 56.1 | OR | None or NA   | 9 |
| Shah_P_USA_2020 <sup>120</sup>                | USA          | AMR  | HI  | 73.9 | 76.2 | 3/2/2020   | 5/6/2020  | EHR | Cohort | Yes | Yes | No  | 522    | 63.0 | 41.8 | OR | Not reported | 8 |
| Shang_J_CHN_2020 <sup>121</sup>               | China        | WPR  | UMI | 82.8 | 49.0 | 12/25/2019 | 3/20/2020 | EHR | Cohort | Yes | Yes | No  | 584    | 59.0 | 47.4 | HR | Independent  | 9 |
| Sheshah_E_SAU_2020 <sup>122</sup>             | Saudi Arabia | EMR  | HI  | 74.5 | 45.0 | 5/1/2020   | 7/31/2020 | OTH | Cohort | Yes | Yes | No  | 300    | 49.7 | 86.3 | OR | Independent  | 8 |
| Shi_S_CHN_2020 <sup>123</sup>                 | China        | WPR  | UMI | 82.8 | 49.0 | 1/1/2020   | 2/23/2020 | EHR | Cohort | Yes | Yes | No  | 671    | 63.0 | 48.0 | HR | Independent  | 8 |
| Singh_S_USA_2020 <sup>124</sup>               | USA          | AMR  | HI  | 73.9 | 76.2 | 1/20/2020  | 5/31/2020 | EHR | C-C    | No  | No  | Yes | 16,224 | 50.0 | 39.0 | RR | Independent  | 8 |
| Smith_AA_USA_2020 <sup>125</sup>              | USA          | AMR  | HI  | 73.9 | 76.2 | 3/1/2020   | 4/22/2020 | EHR | Cohort | Yes | No  | No  | 346    | 66.9 | 56.0 | RR | None or NA   | 8 |
| Sousa_GJB_BRA_2020 <sup>126</sup>             | Brazil       | AMR  | UMI | 72.0 | 51.0 | 2/20/2020  | 4/14/2020 | ARS | Cohort | Yes | No  | Yes | 2,070  | 44.0 | 49.0 | HR | None or NA   | 7 |
| Sun_H_CHN_2020 <sup>127</sup>                 | China        | WPR  | UMI | 82.8 | 49.0 | 1/29/2020  | 3/5/2020  | EHR | Cohort | No  | Yes | No  | 244    | 69.0 | 54.5 | OR | Not reported | 9 |
| Sun_Y_CHN_2020 <sup>128</sup>                 | China        | WPR  | UMI | 82.8 | 49.0 | 1/15/2020  | 4/15/2020 | EHR | Cohort | Yes | Yes | No  | 3,400  | 61.0 | 49.0 | OR | Not reported | 8 |

|                                       |             |     |     |      |      |            |           |     |        |     |     |     |         |      |      |    |              |   |
|---------------------------------------|-------------|-----|-----|------|------|------------|-----------|-----|--------|-----|-----|-----|---------|------|------|----|--------------|---|
| Sutter_W_FRA_2020 <sup>129</sup>      | France      | EUR | HI  | 80.5 | 62.6 | 2/26/2020  | 4/20/2020 | EHR | C-C    | Yes | No  | No  | 1,206   | 71.2 | 61.8 | HR | None or NA   | 8 |
| Tartof_SY_USA_2020 <sup>130</sup>     | USA         | AMR | HI  | 73.9 | 76.2 | 2/13/2020  | 5/2/2020  | EHR | Cohort | Yes | Yes | No  | 6,916   | 49.1 | 45.0 | RR | Independent  | 9 |
| Tavares_C_BRA_2020 <sup>131</sup>     | Brazil      | AMR | UMI | 72.0 | 51.0 | 2/26/2020  | 6/30/2020 | ARS | C-S    | Yes | Yes | Yes | 89,405  | 58.9 | 56.5 | OR | None or NA   | 7 |
| Thompson_J_GBR_2020 <sup>132</sup>    | UK          | EUR | HI  | 78.8 | 68.3 | 3/12/2020  | 5/19/2020 | EHR | Cohort | No  | Yes | No  | 470     | 68.7 | 54.0 | OR | None or NA   | 9 |
| van_Gerwen_M_USA_2020 <sup>133</sup>  | USA         | AMR | HI  | 73.9 | 76.2 | 3/20/2020  | 5/13/2020 | EHR | Cohort | Yes | Yes | Yes | 2,015   | 56.8 | 55.3 | OR | None or NA   | 9 |
| Wang_Z_USA_2020 <sup>134</sup>        | USA         | AMR | HI  | 73.9 | 76.2 | 3/1/2020   | 4/15/2020 | EHR | C-S    | Yes | Yes | Yes | 3,273   | 65.0 | 57.0 | HR | None or NA   | 7 |
| Workinggroup_ESP_2020 <sup>135</sup>  | Spain       | EUR | HI  | 80.5 | 60.4 | 1/31/2020  | 4/27/2020 | ARS | C-S    | Yes | Yes | No  | 218,652 | 61.0 | 43.8 | OR | Not reported | 7 |
| Wu_R_CHN_2020 <sup>136</sup>          | China       | WPR | UMI | 82.8 | 49.0 | 12/10/2019 | 3/18/2020 | ARS | Cohort | Yes | Yes | No  | 21,392  | 50.0 | 52.0 | HR | Independent  | 7 |
| Xie_J_USA-2020 <sup>137</sup>         | USA         | AMR | HI  | 73.9 | 76.2 | 3/30/2020  | 4/5/2020  | OTH | Cohort | Yes | Yes | Yes | 287     | 61.5 | 43.0 | OR | Independent  | 9 |
| Yang_Q_CHN_2020 <sup>138</sup>        | China       | WPR | UMI | 82.8 | 49.0 | 1/1/2020   | 2/29/2020 | EHR | Cohort | No  | Yes | No  | 226     | 53.9 | 51.8 | HR | None or NA   | 8 |
| Yazdanpanah_Y_FRA_2020 <sup>139</sup> | France      | EUR | HI  | 80.5 | 62.6 | 1/24/2020  | 3/15/2020 | ARS | Cohort | Yes | No  | Yes | 246     | 65.0 | 57.0 | HR | Independent  | 9 |
| You_H_KOR_2020 <sup>140</sup>         | South Korea | WPR | HI  | 84.1 | 65.9 | 1/20/2020  | 3/31/2020 | ARS | Cohort | Yes | No  | No  | 5,473   | 45.0 | 44.6 | OR | Not reported | 9 |
| Yu_C_CHN_2020 <sup>141</sup>          | China       | WPR | UMI | 82.8 | 49.0 | 1/14/2020  | 3/26/2020 | OTH | Cohort | Yes | Yes | No  | 1,464   | 64.0 | 50.3 | OR | Independent  | 9 |
| Zandkarimi_E_IRN_2020 <sup>142</sup>  | Iran        | EMR | UMI | 74.8 | 39.5 | 2/22/2020  | 5/18/2020 | EHR | Cohort | Yes | No  | No  | 1,831   | 57.7 | 55.7 | HR | Independent  | 9 |
| Zhang_J_CHN_2020 <sup>143</sup>       | China       | WPR | UMI | 82.8 | 49.0 | 1/1/2020   | 3/17/2020 | EHR | Cohort | Yes | No  | No  | 312     | 57.0 | 44.9 | HR | Independent  | 9 |
| Zhang_Y_CHN_2020 <sup>144</sup>       | China       | WPR | UMI | 82.8 | 49.0 | 1/29/2020  | 3/12/2020 | OTH | Cohort | Yes | No  | No  | 258     | 64.2 | 54.0 | HR | Independent  | 8 |
| Zhu_L_CHN_2020 <sup>145</sup>         | China       | WPR | UMI | 82.8 | 49.0 | 12/30/2019 | 3/20/2020 | OTH | Cohort | Yes | No  | No  | 7,337   | 54.0 | 47.4 | HR | Independent  | 4 |

Note: UK = United Kingdom, USA = United States of America, HI = high income, UMI = upper middle income, LMI = lower middle income, GHSI = global health security index, WHO = World Health Organization, WB = World Bank, AFR = African Region, SEAR = Southeast Asian Region, AMR = American Region, EMR = East Mediterranean Region, EUR = European Region, WPR = West Pacific Region, EHR = electronic health (medical) record, ARS = administrative/registry/surveillance or (case) reporting system, C-C = case-control, C-S = cross-sectional, DM = diabetes mellitus, HTN = hypertension, OB = obesity, ES = effect size, OR = Odds ratio, HR = hazard ratio, RR = relative risk, NOS = Newcastle-Ottawa Scale.

† Population size.

## References

1. Agarwal S, Schechter C, Southern W, et al. Preadmission diabetes-specific risk factors for mortality in hospitalized patients with diabetes and coronavirus disease 2019. *Diabetes Care* 2020;43(10):2339-44.
2. Ahlstrom B, Frithiof R, Hultstrom M, et al. The Swedish covid-19 intensive care cohort: risk factors of icu admission and icu mortality. *Acta Anaesthesiologica Scandinavica* 2021;12:12.
3. Al Wahabi A, Al Rawahi B, Patel PK, et al. COVID-19 disease severity and mortality determinants: A large population-based analysis in Oman. *Travel Medicine & Infectious Disease* 2020;39:101923.
4. Alguwaihes AM, Al-Sofiani ME, Megdad M, et al. Diabetes and Covid-19 among hospitalized patients in Saudi Arabia: a single-centre retrospective study. *Cardiovascular Diabetology* 2020;19(1):205.
5. Allameh SF, Nemati S, Ghalehtaki R, et al. Clinical Characteristics and Outcomes of 905 COVID-19 Patients Admitted to Imam Khomeini Hospital Complex in the Capital City of Tehran, Iran. *Archives of Iranian Medicine* 2020;23(11):766-75.
6. Almazeedi S, Al-Youha S, Jamal MH, et al. Characteristics, risk factors and outcomes among the first consecutive 1096 patients diagnosed with COVID-19 in Kuwait. *EClinicalMedicine* 2020;24:100448.
7. Al-Salameh A, Lanoix JP, Bennis Y, et al. Characteristics and outcomes of COVID-19 in hospitalized patients with and without diabetes. *Diabetes/Metabolism Research Reviews* 2020:e3388.
8. Al-Salameh A, Lanoix JP, Bennis Y, et al. The association between body mass index class and coronavirus disease 2019 outcomes. *International Journal of Obesity* 2020;21:21.
9. Amit M, Sorkin A, Chen J, et al. Clinical Course and Outcomes of Severe Covid-19: A National Scale Study. *Journal of Clinical Medicine* 2020;9(7):18.
10. Baqui P, Bica I, Marra V, et al. Ethnic and regional variations in hospital mortality from COVID-19 in Brazil: a cross-sectional observational study. *The Lancet Global Health* 2020;8(8):e1018-e26.
11. Barron E, Bakhai C, Kar P, et al. Associations of type 1 and type 2 diabetes with COVID-19-related mortality in England: a whole-population study. *Lancet Diabetes Endocrinol* doi: 10.1016/s2213-8587(20)30272-2
12. Bellan M, Patti G, Hayden E, et al. Fatality rate and predictors of mortality in an Italian cohort of hospitalized COVID-19 patients. *Scientific Reports* 2020;10(1):20731.



13. Bepouka BI, Mandina M, Makulo JR, et al. Predictors of mortality in COVID-19 patients at Kinshasa University Hospital, Democratic Republic of the Congo, from March to June 2020. *The Pan African medical journal* 2020;37:105.
14. Berenguer J, Ryan P, Rodriguez-Bano J, et al. Characteristics and predictors of death among 4035 consecutively hospitalized patients with COVID-19 in Spain. *Clinical Microbiology and Infection* 2020;26(11):1525-36.
15. Bhargava A, Sharma M, Akagi E, et al. Predictors for In-Hospital Mortality from COVID-19 Infection among Adults 18-65 Years. *Infection Control & Hospital Epidemiology* 2020;1-13.
16. Biscarini S, Colaneri M, Ludovisi S, et al. The obesity paradox: analysis from the SMAtteo Covid-19 REgistry (SMACORE) cohort. *Nutr Metab Cardiovasc Dis* doi: 10.1016/j.numecd.2020.07.047
17. Boulle A, Davies MA, Hussey H, et al. Risk factors for COVID-19 death in a population cohort study from the Western Cape Province, South Africa. *Clinical Infectious Diseases* 2020;29:29.
18. Breland JY, Wong MS, Steers WN, et al. Body Mass Index and Risk for Severe COVID-19 among Veterans Health Administration Patients. *Obesity* 2021;05:05.
19. Cai Y, Shi S, Yang F, et al. Fasting blood glucose level is a predictor of mortality in patients with COVID-19 independent of diabetes history. *Diabetes Research & Clinical Practice* 2020;108437.
20. Cao Y, Han X, Gu J, et al. Prognostic value of baseline clinical and HRCT findings in 101 patients with severe COVID-19 in Wuhan, China. *Scientific Reports* 2020;10(1):17543.
21. Carrillo-Vega MF, Salinas-Escudero G, Garcia-Pena C, et al. Early estimation of the risk factors for hospitalization and mortality by COVID-19 in Mexico. *PLoS ONE [Electronic Resource]* 2020;15(9):e0238905.
22. Cernigliaro A, Allotta AV, Scondotto S. [Can diabetes and its related hypoglycemic drug treatment be considered risk factors for health outcomes in COVID-19 patients? The results of a study in the population residing in Sicily Region (Southern Italy)]. *Epidemiologia e Prevenzione* 2020;44(5-6 Suppl 2):315-22.
23. Chang MC, Hwang JM, Jeon JH, et al. Fasting Plasma Glucose Level Independently Predicts the Mortality of Patients with Coronavirus Disease 2019 Infection: A Multicenter, Retrospective Cohort Study. *Endocrinology and Metabolism* 2020;26:26.
24. Cheng X, Cai G, Wen X, et al. Clinical characteristics and fatal outcomes of hypertension in patients with severe COVID-19. *Aging* 2020;12(23):23436-49.
25. Chilimuri S, Sun H, Alemam A, et al. Predictors of Mortality in Adults Admitted with COVID-19: Retrospective Cohort Study from New York City. *The Western Journal of Emergency Medicine* 2020;21(4):779-84.
26. Ciardullo S, Zerbini F, Perra S, et al. Impact of diabetes on COVID-19-related in-hospital mortality: a retrospective study from Northern Italy. *Journal of Endocrinological Investigation* 2020;10:10.
27. Covid-Icu Group on behalf of the RN, the C-ICUI. Clinical characteristics and day-90 outcomes of 4244 critically ill adults with COVID-19: a prospective cohort study. *Intensive Care Medicine* 2021;47(1):60-73.
28. Cummings MJ, Baldwin MR, Abrams D, et al. Epidemiology, clinical course, and outcomes of critically ill adults with COVID-19 in New York city: a prospective cohort study. *Lancet* 2020;395(10239):1763-70.
29. Dennis JM, Mateen BA, Sonabend R, et al. Type 2 Diabetes and COVID-19-Related Mortality in the Critical Care Setting: A National Cohort Study in England, March-July 2020. *Diabetes Care* 2020;23:23.
30. de Souza CDF, de Arruda Magalhães AJ, Lima AJPD, et al. Clinical manifestations and factors associated with mortality from COVID-19 in older adults: Retrospective population-based study with 9807 older Brazilian COVID-19 patients. *Geriatrics & gerontology international* 2020;20(12):1177-81. doi: 10.1111/ggi.14061
31. Di Castelnuovo A, Bonaccio M, Costanzo S, et al. Common cardiovascular risk factors and in-hospital mortality in 3,894 patients with COVID-19: survival analysis and machine learning-based findings from the multicentre Italian CORIST Study. *Nutrition Metabolism & Cardiovascular Diseases* 2020;31:31.
32. Eshtrati B, Baradaran HR, Erfanpoor S, et al. Investigating the factors affecting the survival rate in patients with COVID-19: A retrospective cohort study. *Medical Journal of the Islamic Republic of Iran* 2020;34:88.
33. Filardo TD, Khan MR, Krawczyk N, et al. Comorbidity and clinical factors associated with COVID-19 critical illness and mortality at a large public hospital in New York City in the early phase of the pandemic (March-April 2020). *PLoS ONE [Electronic Resource]* 2020;15(11):e0242760.
34. Fox T, Ruddiman K, Lo KB, et al. The relationship between diabetes and clinical outcomes in COVID-19: a single-center retrospective analysis. *Acta Diabetologica* 2020;17:17.
35. Fried MW, Crawford JM, Mospan AR, et al. Patient Characteristics and Outcomes of 11,721 Patients with COVID19 Hospitalized Across the United States. *Clinical Infectious Diseases* 2020;28:28.
36. Fumagalli C, Rozzini R, Vannini M, et al. Clinical risk score to predict in-hospital mortality in COVID-19 patients: a retrospective cohort study. *BMJ Open* 2020;10(9):e040729.
37. Galloway JB, Norton S, Barker RD, et al. A clinical risk score to identify patients with COVID-19 at high risk of critical care admission or death: An observational cohort study. *Journal of Infection* 2020;81(2):282-88.
38. Giacomelli A, Ridolfo AL, Milazzo L, et al. 30-day mortality in patients hospitalized with COVID-19 during the first wave of the Italian epidemic: A prospective cohort study. *Pharmacological Research* 2020;158:104931.
39. Gil-Rodrigo A, Miro O, Pinerá P, et al. Analysis of clinical characteristics and outcomes in patients with covid-19 based on a series of 1000 patients treated in spanish emergency departments. [Spanish]. *Emergencias* 2020;32(4):233-41.
40. Goodman KE, Magder LS, Baghdadi JD, et al. Impact of Sex and Metabolic Comorbidities on COVID-19 Mortality Risk Across Age Groups: 66,646 Inpatients Across 613 U.S. Hospitals. *Clinical Infectious Diseases* 2020;18:18.
41. Grasselli G, Greco M, Zanella A, et al. Risk Factors Associated With Mortality Among Patients With COVID-19 in Intensive Care Units in Lombardy, Italy. *JAMA Internal Medicine* 2020;15:15.
42. Gupta S, Hayek SS, Wang W, et al. Factors associated with death in critically ill patients with coronavirus disease 2019 in the US. *JAMA Internal Medicine* 2020;180(11):1436-46.
43. Gutierrez JP, Bertozzi SM. Non-communicable diseases and inequalities increase risk of death among COVID-19 patients in Mexico. *PLoS ONE [Electronic Resource]* 2020;15(10):e0240394.
44. Haase N, Plovsing R, Christensen S, et al. Characteristics, interventions, and longer term outcomes of COVID-19 ICU patients in Denmark-A nationwide, observational study. *Acta Anaesthesiologica Scandinavica* 2021;65(1):68-75.
45. Hajifathalian K, Kumar S, Newberry C, et al. Obesity is Associated with Worse Outcomes in COVID-19: Analysis of Early Data from New York City. *Obesity* 2020;28(9):1606-12.
46. Harrison SL, Fazio-Eynullayeva E, Lane DA, et al. Comorbidities associated with mortality in 31,461 adults with COVID-19 in the United States: A federated electronic medical record analysis. *PLoS Medicine / Public Library of Science* 2020;17(9):e1003321.
47. Hernandez-Galdamez DR, Gonzalez-Block MA, Romo-Duenas DK, et al. Increased Risk of Hospitalization and Death in Patients with COVID-19 and Pre-existing Noncommunicable Diseases and Modifiable Risk Factors in Mexico. *Archives of Medical Research* 2020;51(7):683-89.
48. Huang S, Wang J, Liu F, et al. COVID-19 patients with hypertension have more severe disease: a multicenter retrospective observational study. *Hypertension Research - Clinical & Experimental* 2020;43(8):824-31.
49. Hui Y, Li Y, Tong X, et al. The risk factors for mortality of diabetic patients with severe COVID-19: A retrospective study of 167 severe COVID-19 cases in Wuhan. *PLoS ONE [Electronic Resource]* 2020;15(12):e0243602.
50. Iaccarino G, Grassi G, Borghi C, et al. Gender differences in predictors of intensive care units admission among COVID-19 patients: The results of the SARS-RAS study of the Italian Society of Hypertension. *PLoS ONE [Electronic Resource]* 2020;15(10):e0237297.
51. Ioannou GN, Locke E, Green P, et al. Risk Factors for Hospitalization, Mechanical Ventilation, or Death Among 10131 US Veterans With SARS-CoV-2 Infection. *JAMA Network Open* 2020;3(9):e2022310.
52. Izurieta HS, Graham DJ, Jiao Y, et al. Natural history of COVID-19: Risk factors for hospitalizations and deaths among >26 million U.S. Medicare beneficiaries. *Journal of Infectious Diseases* 2020;16:16.

53. Jackson BR, Gold JAW, Natarajan P, et al. Predictors at admission of mechanical ventilation and death in an observational cohort of adults hospitalized with COVID-19. *Clinical Infectious Diseases* 2020;24:24.
54. Jain AC, Kansal S, Sardana R, et al. A retrospective observational study to determine the early predictors of in-hospital mortality at admission with covid-19. *Indian Journal of Critical Care Medicine* 2020;24(12):1174-79.
55. Jiang Y, Abudurexiti S, An MM, et al. Risk factors associated with 28-day all-cause mortality in older severe COVID-19 patients in Wuhan, China: a retrospective observational study. *Scientific Reports* 2020;10(1):22369.
56. Kaeuffer C, Le Hyaric C, Fabacher T, et al. Clinical characteristics and risk factors associated with severe COVID-19: prospective analysis of 1,045 hospitalised cases in North-Eastern France, March 2020. *Euro Surveillance: Bulletin Europeen sur les Maladies Transmissibles = European Communicable Disease Bulletin* 2020;25(48):12.
57. Kim DW, Byeon KH, Kim J, et al. The Correlation of Comorbidities on the Mortality in Patients with COVID-19: an Observational Study Based on the Korean National Health Insurance Big Data. *Journal of Korean Medical Science* 2020;35(26):e243.
58. Kim SW, Kim SM, Kim YK, et al. Clinical Characteristics and Outcomes of COVID-19 Cohort Patients in Daegu Metropolitan City Outbreak in 2020. *Journal of Korean Medical Science* 2021;36(1):e12.
59. Kim SY, Yoo DM, Min C, et al. Analysis of Mortality and Morbidity in COVID-19 Patients with Obesity Using Clinical Epidemiological Data from the Korean Center for Disease Control & Prevention. *International Journal of Environmental Research & Public Health [Electronic Resource]* 2020;17(24):14.
60. Kim TS, Roslin M, Wang JJ, et al. BMI as a Risk Factor for Clinical Outcomes in Patients Hospitalized with COVID-19 in New York. *Obesity* 2020;31:31.
61. Klang E, Kassim G, Soffer S, et al. Severe Obesity as an Independent Risk Factor for COVID-19 Mortality in Hospitalized Patients Younger than 50. *Obesity* 2020;28(9):1595-99.
62. Kocayigit I, Kocayigit H, Yaylaci S, et al. Impact of antihypertensive agents on clinical course and in-hospital mortality: analysis of 169 hypertensive patients hospitalized for COVID-19. *Revista Da Associacao Medica Brasileira* 2020;66Suppl 2(Suppl 2):71-76.
63. Kunal S, Sharma SM, Sharma SK, et al. Cardiovascular complications and its impact on outcomes in COVID-19. *Indian Heart Journal* 2020;72(6):593-98.
64. Lanini S, Montaldo C, Nicastrì E, et al. COVID-19 disease—Temporal analyses of complete blood count parameters over course of illness, and relationship to patient demographics and management outcomes in survivors and non-survivors: A longitudinal descriptive cohort study. *PLoS ONE* 2020;15(12):1-17. doi: 10.1371/journal.pone.0244129
65. Lee SG, Park GU, Moon YR, et al. Clinical Characteristics and Risk Factors for Fatality and Severity in Patients with Coronavirus Disease in Korea: A Nationwide Population-Based Retrospective Study Using the Korean Health Insurance Review and Assessment Service (HIRA) Database. *International Journal of Environmental Research & Public Health [Electronic Resource]* 2020;17(22):18.
66. Li H, Tian S, Chen T, et al. Newly diagnosed diabetes is associated with a higher risk of mortality than known diabetes in hospitalized patients with COVID-19. *Diabetes, Obesity & Metabolism* 2020;22(10):1897-906. doi: 10.1111/dom.14099
67. Liu J, Zhang S, Wu Z, et al. Clinical outcomes of COVID-19 in Wuhan, China: a large cohort study. *Annals of Intensive Care* 2020;10(1):99.
68. Liu M, Han S, Liao Q, et al. Outcomes and prognostic factors in 70 non-survivors and 595 survivors with COVID-19 in Wuhan, China. *Transboundary & Emerging Diseases* 2020;30:30.
69. Liu Z, Li J, Huang J, et al. Association Between Diabetes and COVID-19: A Retrospective Observational Study With a Large Sample of 1,880 Cases in Leishenshan Hospital, Wuhan. *Frontiers in Endocrinology* 2020;11:478.
70. Mancilla-Galindo J, Vera-Zertuche JM, Navarro-Cruz AR, et al. Development and validation of the patient history COVID-19 (PH-Covid19) scoring system: a multivariable prediction model of death in Mexican patients with COVID-19. *Epidemiology & Infection* 2020;148:e286.
71. Mansour A, Sajjadi-Jazi SM, Kasaean A, et al. Clinical characteristics and outcomes of diabetics hospitalized for COVID-19 infection: a single-centered, retrospective, observational study. *Excli Journal* 2020;19:1533-43.
72. Martos-Benitez FD, Soler-Morejon CD, Garcia-Del Barco D. Chronic comorbidities and clinical outcomes in patients with and without COVID-19: a large population-based study using national administrative healthcare open data of Mexico. *Internal & Emergency Medicine* 2021;07:07.
73. McNeill JN, Lau ES, Paniagua SM, et al. The role of obesity in inflammatory markers in COVID-19 patients. *Obesity Research & Clinical Practice* 2020;23:23.
74. Mejia F, Medina C, Comejo E, et al. Oxygen saturation as a predictor of mortality in hospitalized adult patients with COVID-19 in a public hospital in Lima, Peru. *PLoS ONE [Electronic Resource]* 2020;15(12):e0244171.
75. Mikami T, Miyashita H, Yamada T, et al. Risk Factors for Mortality in Patients with COVID-19 in New York City. *Journal of General Internal Medicine* 2020;30:30.
76. Miller J, Fadel RA, Tang A, et al. The Impact of Sociodemographic Factors, Comorbidities and Physiologic Response on 30-day Mortality in COVID-19 Patients in Metropolitan Detroit. *Clinical Infectious Diseases* 2020;18:18.
77. Mirani M, Favacchio G, Carrone F, et al. Impact of Comorbidities and Glycemia at Admission and Dipeptidyl Peptidase 4 Inhibitors in Patients With Type 2 Diabetes With COVID-19: A Case Series From an Academic Hospital in Lombardy, Italy. *Diabetes Care* 2020;43(12):3042-49.
78. Moon SJ, Rhee EJ, Jung JH, et al. Independent Impact of Diabetes on the Severity of Coronavirus Disease 2019 in 5,307 Patients in South Korea: A Nationwide Cohort Study. *Diabetes & Metabolism Journal* 2020;44(5):737-46.
79. Munoz P, Galar A, Catalan P, et al. The first 100 cases of COVID-19 in a Hospital in Madrid with a 2-month follow-up. *Revista Espanola de Quimioterapia* 2020;30:30.
80. Mukherjee V, Toth AT, Fenianos M, et al. Clinical Outcomes in Critically Ill Coronavirus Disease 2019 Patients: A Unique New York City Public Hospital Experience. *Critical Care Explorations* 2020;2(8):e0188.
81. Munblit D, Nekliudov NA, Bugaeva P, et al. StopCOVID cohort: An observational study of 3,480 patients admitted to the Sechenov University hospital network in Moscow city for suspected COVID-19 infection. *Clinical Infectious Diseases* 2020;09:09.
82. Nachega JB, Ishoso DK, Otokoye JO, et al. Clinical Characteristics and Outcomes of Patients Hospitalized for COVID-19 in Africa: Early Insights from the Democratic Republic of the Congo. *American Journal of Tropical Medicine & Hygiene* 2020;103(6):2419-28.
83. Nachtigall I, Lenga P, Jozwiak K, et al. Clinical course and factors associated with outcomes among 1904 patients hospitalized with COVID-19 in Germany: an observational study. *Clinical Microbiology and Infection* 2020;26(12):1663-69.
84. Nakeshbandi M, Maini R, Daniel P, et al. The impact of obesity on COVID-19 complications: a retrospective cohort study. *International Journal of Obesity* 2020;44(9):1832-37.
85. Nogueira PJ, de Araujo Nobre M, Costa A, et al. The Role of Health Preconditions on COVID-19 Deaths in Portugal: Evidence from Surveillance Data of the First 20293 Infection Cases. *Journal of Clinical Medicine* 2020;9(8):24.

86. Orioli L, Servais T, Belkhir L, et al. Clinical characteristics and short-term prognosis of in-patients with diabetes and COVID-19: A retrospective study from an academic center in Belgium. *Diabetes & Metabolic Syndrome* 2020;15(1):149-57.
87. Orwa A, Rama B, Jer Ping O, et al. Risk factors for mortality among COVID-19 patients. (Special issue on diabetes and COVID-19: the IDF perspective.). *Diabetes Research and Clinical Practice* 2020;166(34)
88. Pacheco-Pantoja EL, Ferreyro-Bravo FA, Ceballos-Cruz AE. COVID-19, diabetes, obesidad e hipertensión arterial: 60 días de pandemia en México. *Revista Mexicana de Endocrinología, Metabolismo y Nutrición* 2020;7(2):68-79. doi: 10.24875/RME.20000042
89. Palaiodimos L, Kokkinidis DG, Li W, et al. Severe obesity, increasing age and male sex are independently associated with worse in-hospital outcomes, and higher in-hospital mortality, in a cohort of patients with COVID-19 in the Bronx, New York. *Metabolism: Clinical & Experimental* 2020;108:154262.
90. Panagiotou OA, Kosar CM, White EM, et al. Risk Factors Associated With All-Cause 30-Day Mortality in Nursing Home Residents With COVID-19. *JAMA Internal Medicine* 2021;04:04.
91. Parikh R, Garcia MA, Rajendran I, et al. ICU outcomes in Covid-19 patients with obesity. *Therapeutic Advances in Respiratory Disease* 2020;14:1753466620971146.
92. Park BE, Lee JH, Park HK, et al. Impact of Cardiovascular Risk Factors and Cardiovascular Diseases on Outcomes in Patients Hospitalized with COVID-19 in Daegu Metropolitan City. *Journal of Korean Medical Science* 2021;36(2):e15.
93. Park JG, Kang MK, Lee YR, et al. Fibrosis-4 index as a predictor for mortality in hospitalised patients with COVID-19: a retrospective multicentre cohort study. *BMJ Open* 2020;10(11):e041989.
94. Parra-Bracamonte GM, Lopez-Villalobos N, Parra-Bracamonte FE. Clinical characteristics and risk factors for mortality of patients with COVID-19 in a large data set from Mexico. *Annals of Epidemiology* 2020;52:93-98.e2.
95. Pena JE, Rascon-Pacheco RA, Ascencio-Montiel JJ, et al. Hypertension, Diabetes and Obesity, Major Risk Factors for Death in Patients With COVID-19 in Mexico. *Archives of Medical Research* 2020;16:16.
96. Petrilli CM, Jones SA, Yang J, et al. Factors associated with hospital admission and critical illness among 5279 people with coronavirus disease 2019 in New York City: prospective cohort study. *BMJ* 2020;369:m1966.
97. Pettit NN, MacKenzie EL, Ridgway JP, et al. Obesity is Associated with Increased Risk for Mortality Among Hospitalized Patients with COVID-19. *Obesity* 2020;28(10):1806-10.
98. Polverino F, Stern DA, Ruocco G, et al. Comorbidities, Cardiovascular Therapies, and COVID-19 Mortality: A Nationwide, Italian Observational Study (ItaliCO). *Frontiers in Cardiovascular Medicine* 2020;7:585866.
99. Posso M, Comas M, Roman M, et al. Comorbidities and Mortality in Patients With COVID-19 Aged 60 Years and Older in a University Hospital in Spain. *Archivos de Bronconeumología* 2020;56(11):756-58.
100. Prado-Galbarro FJ, Sanchez-Piedra C, Gamino-Arroyo AE, et al. Determinants of survival after severe acute respiratory syndrome coronavirus 2 infection in Mexican outpatients and hospitalised patients. *Public Health* 2020;189:66-72.
101. Qin W, Hu BZ, Zhang Z, et al. [Clinical characteristics and death risk factors of severe COVID-19]. *Chung-Hua Chieh Ho Ho Hu Hsi Tsa Chih Chinese Journal of Tuberculosis & Respiratory Diseases* 2020;43(8):648-53.
102. Qin WD, Bai W, Liu K, et al. Clinical course and risk factors of disease deterioration in critically ill patients with COVID-19. *Human Gene Therapy* 2021;07:07.
103. Rastad H, Ejtahed HS, Mahdavi-Ghorabi A, et al. Factors associated with the poor outcomes in diabetic patients with COVID-19. *Journal of Diabetes & Metabolic Disorders* 2020;1-10.
104. Reilev M, Kristensen KB, Pottegard A, et al. Characteristics and predictors of hospitalization and death in the first 11 122 cases with a positive RT-PCR test for SARS-CoV-2 in Denmark: a nationwide cohort. *International Journal of Epidemiology* 2020;49(5):1468-81.
105. Rethemiotaki I. A preliminary study of coronavirus disease 2019 in China: the impact of cardiovascular disease on death risk. *Archives of Medical Sciences Atherosclerotic Diseases* 2020;5:e219-e23.
106. Rivera-Izquierdo M, Del Carmen Valero-Ubierna M, JI Rd, et al. Sociodemographic, clinical and laboratory factors on admission associated with COVID-19 mortality in hospitalized patients: A retrospective observational study. *PLoS ONE [Electronic Resource]* 2020;15(6):e0235107.
107. Rodriguez-Gonzalez CG, Chamorro-de-Vega E, Valerio M, et al. COVID-19 in hospitalised patients in Spain: a cohort study in Madrid. *International Journal of Antimicrobial Agents* 2020;106249.
108. Rodriguez-Molinero A, Galvez-Barron C, Minarro A, et al. Association between COVID-19 prognosis and disease presentation, comorbidities and chronic treatment of hospitalized patients. *PLoS ONE [Electronic Resource]* 2020;15(10):e0239571.
109. Rodriguez-Nava G, Yanez-Bello MA, Trelles-Garcia DP, et al. Clinical characteristics and risk factors for mortality of hospitalized patients with COVID-19 in a community hospital: A retrospective cohort study. *Mayo Clinic Proceedings Innovations, Quality & Outcomes* 2020;05:05.
110. Rosenthal N, Cao Z, Gundrum J, et al. Risk Factors Associated With In-Hospital Mortality in a US National Sample of Patients With COVID-19. *JAMA Network Open* 2020;3(12):e2029058.
111. Rossi AP, Gottin L, Donadello K, et al. Obesity as a risk factor for unfavourable outcomes in critically ill patients affected by Covid 19. *Nutr Metab Cardiovasc Dis* doi: 10.1016/j.numecd.2020.11.012
112. Rossi PG, Marino M, Formisano D, et al. Characteristics and outcomes of a cohort of COVID-19 patients in the Province of Reggio Emilia, Italy. *PLoS ONE* 2020;15 (8 August) (no pagination)(e0238281)
113. Rottoli M, Bernante P, Belvedere A, et al. How important is obesity as a risk factor for respiratory failure, intensive care admission and death in hospitalised COVID-19 patients? Results from a single Italian centre. *European Journal of Endocrinology* 2020;183(4):389-97.
114. Rozaliyani A, Savitri AI, Setianingrum F, et al. Factors Associated with Death in COVID-19 Patients in Jakarta, Indonesia: An Epidemiological Study. *Acta Medica Indonesiana* 2020;52(3):246-54.
115. Saand AR, Flores M, Kewan T, et al. Does inpatient hyperglycemia predict a worse outcome in COVID-19 intensive care unit patients? *Journal Of Diabetes* 2020;20:20.
116. Salacup G, Lo KB, Gul F, et al. Characteristics and clinical outcomes of COVID-19 patients in an underserved-inner city population: A single tertiary center cohort. *Journal of Medical Virology* 2020;03:03.
117. Santos MM, Lucena EES, Lima KC, et al. Survival and predictors of deaths of patients hospitalised due to COVID-19 from a retrospective and multicentre cohort study in Brazil. *Epidemiology & Infection* 2020;148:e198.
118. Seiglie J, Platt J, Cromer SJ, et al. Diabetes as a risk factor for poor early outcomes in patients hospitalized with covid-19. *Diabetes Care* 2020;43(12):2938-44.
119. Shah C, Grando DJ, Rainess RA, et al. Factors associated with increased mortality in hospitalized COVID-19 patients. *Annals of Medicine & Surgery* 2020;60:308-13.
120. Shah P, Owens J, Franklin J, et al. Demographics, comorbidities and outcomes in hospitalized Covid-19 patients in rural southwest Georgia. *Annals of Medicine* 2020:1-7.
121. Shang J, Wang Q, Zhang H, et al. The Relationship between Diabetes Mellitus and COVID-19 Prognosis: A Retrospective Cohort Study in Wuhan, China. *American Journal of Medicine* 2020;09:09.
122. Sheshah E, Sabico S, Albakr RM, et al. Prevalence of Diabetes, Management and Outcomes among Covid-19 Adult Patients Admitted in a Specialized Tertiary Hospital in Riyadh, Saudi Arabia. *Diabetes Research & Clinical Practice* 2020:108538.
123. Shi S, Qin M, Cai Y, et al. Characteristics and clinical significance of myocardial injury in patients with severe coronavirus disease 2019. *European Heart Journal* 2020;41(22):2070-79.
124. Singh S, Bilal M, Pakhchanian H, et al. Impact of Obesity on Outcomes of Patients With Coronavirus Disease 2019 in the United States: A Multicenter Electronic Health Records Network Study. *Gastroenterology* 2020;159(6):2221-25.e6.

125. Smith AA, Fridling J, Ibrahim D, et al. Identifying Patients at Greatest Risk of Mortality due to COVID-19: A New England Perspective. *The Western Journal of Emergency Medicine* 2020;21(4):785-89.
126. Sousa GJB, Garces TS, Cestari VRF, et al. Mortality and survival of COVID-19. *Epidemiology & Infection* 2020;148:e123.
127. Sun H, Ning R, Tao Y, et al. Risk Factors for Mortality in 244 Older Adults With COVID-19 in Wuhan, China: A Retrospective Study. *Journal of the American Geriatrics Society* 2020;68(6):E19-E23.
128. Sun Y, Guan X, Jia L, et al. Independent and combined effects of hypertension and diabetes on clinical outcomes in patients with COVID-19: A retrospective cohort study of Huoshen Mountain Hospital and Guanggu Fangcang Shelter Hospital. *Journal of Clinical Hypertension* 2020;25:25.
129. Sutter W, Duceau B, Vignac M, et al. Association of diabetes and outcomes in patients with COVID-19: Propensity score-matched analyses from a French retrospective cohort. *Diabetes & Metabolism* 2020:101222.
130. Tartof SY, Qian L, Hong V, et al. Obesity and mortality among patients diagnosed with COVID-19: results from an integrated health care organization. *Annals of Internal Medicine* 2020;173(10):773-81.
131. de Andrade CLT, Pereira CCA, Martins M, et al. COVID-19 hospitalizations in Brazil's Unified Health System (SUS). *PLoS ONE [Electronic Resource]* 2020;15(12):e0243126.
132. Thompson JV, Meghani NJ, Powell BM, et al. Patient characteristics and predictors of mortality in 470 adults admitted to a district general hospital in England with Covid-19. *Epidemiology & Infection* 2020;148:e285.
133. van Gerwen M, Alsen M, Little C, et al. Risk factors and outcomes of COVID-19 in New York City; a retrospective cohort study. *Journal of Medical Virology* 2020;24:24.
134. Wang Z, Zheutlin A, Kao YH, et al. Hospitalised COVID-19 patients of the Mount Sinai Health System: a retrospective observational study using the electronic medical records. *BMJ Open* 2020;10(10):e040441.
135. Working group for the s, control of C-iS, Members of the Working group for the s, et al. The first wave of the COVID-19 pandemic in Spain: characterisation of cases and risk factors for severe outcomes, as at 27 April 2020. *Euro Surveillance: Bulletin Europeen sur les Maladies Transmissibles = European Communicable Disease Bulletin* 2020;25(50):12.
136. Wu R, Ai S, Cai J, et al. Predictive model and risk factors for case fatality of COVID-19: a cohort of 21,392 cases in Hubei, China. *Innovation* 2020 doi: 10.1016/j.xinn.2020.100022
137. Xie J, Zu Y, Alkhatib A, et al. Metabolic Syndrome and COVID-19 Mortality Among Adult Black Patients in New Orleans. *Diabetes Care* 2020;25:25.
138. Yang Q, Zhou Y, Wang X, et al. Effect of hypertension on outcomes of adult inpatients with COVID-19 in Wuhan, China: A propensity score-matching analysis. *Respiratory Research* 2020;21 (1) (no pagination)(172)
139. Yazdanpanah Y, French Cci, study g. Impact on disease mortality of clinical, biological, and virological characteristics at hospital admission and overtime in COVID-19 patients. *Journal of Medical Virology* 2020;15:15.
140. You JH, Lee SA, Chun SY, et al. Clinical Outcomes of COVID-19 Patients with Type 2 Diabetes: A Population-Based Study in Korea. *Endocrinology and Metabolism* 2020;35(4):901-08.
141. Yu C, Lei Q, Li W, et al. Clinical Characteristics, Associated Factors, and Predicting COVID-19 Mortality Risk: A Retrospective Study in Wuhan, China. *American Journal of Preventive Medicine* 2020;59(2):168-75.
142. Zandkarimi E, Moradi G, Mohsenpour B. The Prognostic Factors Affecting the Survival of Kurdistan Province COVID-19 Patients: A Cross-sectional Study From February to May 2020. *International Journal of Health Policy & Management* 2020;22:22.
143. Zhang J, Kong W, Xia P, et al. Impaired Fasting Glucose and Diabetes Are Related to Higher Risks of Complications and Mortality Among Patients With Coronavirus Disease 2019. *Frontiers in Endocrinology* 2020;11:525.
144. Zhang Y, Cui Y, Shen M, et al. Association of diabetes mellitus with disease severity and prognosis in COVID-19: A retrospective cohort study. *Diabetes Research & Clinical Practice* 2020;165:108227.
145. Zhu L, She ZG, Cheng X, et al. Association of Blood Glucose Control and Outcomes in Patients with COVID-19 and Pre-existing Type 2 Diabetes. *Cell Metabolism* 2020;31(6):1068-77.e3.
